1 **Bund removal to re-establish tidal flow, remove aquatic weeds and**  
2 **restore coastal wetland services - North Queensland, Australia**

3

4 **Brett N. Abbott<sup>1\*</sup>, Jim Wallace<sup>1,2</sup>, David M. Nicholas<sup>1,3</sup>, Fazlul Karim<sup>4</sup>, Nathan J. Waltham<sup>2</sup>**

5

6 <sup>1</sup>CSIRO Land and Water, Australian Tropical Science and Innovation Precinct, Townsville, QLD  
7 4814, Australia

8 <sup>2</sup>Centre for Tropical Water & Aquatic Ecosystem Research (TropWATER), James Cook  
9 University, Townsville, QLD 4811, Australia

10 <sup>3</sup>Independent Consultant, 5 Chapman Street Mysterton, 4812 Townsville, Australia.

11 <sup>4</sup>CSIRO Land and Water, Black Mountain Laboratories, Canberra, ACT 2601, Australia

12

13 \*Corresponding author - E-mail: [brett.abbott@csiro.au](mailto:brett.abbott@csiro.au)

## 14 **Abstract**

15 The shallow tidal and freshwater coastal wetlands adjacent to the Great Barrier Reef lagoon  
16 provide a vital nursery and feeding complex that supports the life cycles of marine and  
17 freshwater fish, important native vegetation and vital bird habitat. Urban and agricultural  
18 development threaten these wetlands, with many of the coastal wetlands becoming lost or  
19 changed due to the construction of artificial barriers (e.g. bunds, roads, culverts and  
20 floodgates). Infestation by weeds has become a major issue within many of the wetlands that  
21 were modified (bunded) for ponded pasture growth last century. A range of expensive  
22 chemical and mechanical control methods has been used to try and restore some of these  
23 coastal wetlands, with limited success. This study describes an alternative approach to those  
24 methods, investigating the impact of tidal reinstatement after bund removal on weed  
25 infestation, associated changes in water quality, and fish biodiversity, in the Boolgooroo  
26 lagoon region of the Mungalla wetlands, East of Ingham in North Queensland. High resolution  
27 remote sensing, electrofishing and in-water logging was used to track changes over time – 1  
28 year before and 4 years after removal of an earth bund. With tides only penetrating the  
29 wetland a few times yearly, gross changes towards a more natural system occurred within a  
30 relatively short timeframe, leading to a reduction in weed infestation, reappearance of native  
31 vegetation, improvements in water quality, and a tripling of fish diversity. Weed abundance  
32 and water quality does appear to oscillate however, dependent on summer rainfall, as  
33 changes in hydraulic pressure stops or allows tidal ingress (fresh/saline cycling). With an  
34 estimated 30% of coastal wetlands bunded in the Great Barrier Reef region, a passive  
35 remediation method such as reintroduction of tidal flow by removal of an earth bund or levee  
36 could provide a more cost effective and sustainable means of controlling freshwater weeds  
37 and improving coastal water quality into the future.

38

## 39 **Introduction**

40 Coastal floodplains around the world have been modified for human gain, most notably being  
41 hydrologically altered either totally or partially reducing connectivity between floodplains and  
42 coastal areas [1, 2]. Floodplain, coastal tidal and freshwater wetlands are important habitat  
43 because they provide important biodiversity, hydrological, cultural and economic goods and  
44 services [3-5]. However, these wetlands are under great pressure due to urban and industrial  
45 development [6, 7] or agricultural and grazing land expansion, with many coastal wetlands  
46 becoming lost due to the construction of artificial barriers (e.g. bunds, roads, culverts and  
47 floodgates) which have stopped or reduced tidal flushing, negatively impacting aesthetic and  
48 ecological values [8]. The widespread degradation of coastal wetlands has led to major shifts  
49 in species assemblages and declines in aquatic species productivity. In response, there has  
50 been increased effort to rehabilitate coastal wetlands by removing these artificial barriers [9,  
51 10], and provide protection and restoration of coastal wetlands [11] to improve their  
52 ecosystem services including connectivity and functionality as productive fish habitat [12, 13]  
53 and also deliver opportunities for carbon sequestration and storage [14].

54 The coastal wetlands of north Queensland contain unique and valuable biodiversity at the  
55 interface between two World Heritage areas; the Great Barrier Reef and Australia's tropical  
56 rainforests [15, 16]. These wetlands are important ecological assets with significant cultural  
57 and economic values [17]. In their natural state they provide habitat for native plants and  
58 animals, migratory birds as well as potential water quality improvement and hydrological  
59 regulation functions [18-20]. The aboriginal peoples of Australia associate great cultural value  
60 to wetlands [21, 22], which also have commercial and recreational value [23, 24]. However,

61 many of the wetlands along the north Queensland coast, and the services they provide, have  
62 been lost; for example, it has been estimated that between 60 and 90% of freshwater and  
63 saline wetlands have vanished in favour of rural and urban development [6, 25, 26]. Of the  
64 wetlands that remain, many are degraded via a combination of earth bunding, to exclude  
65 seawater and reclaim land for pasture [27-29], upstream agricultural use (grazing and sugar  
66 cane production) which leaches ecologically damaging nutrients and sediments [30, 31], and  
67 extensive aquatic invasive weed chokes [32, 33] which contributes to hypoxic conditions and  
68 fish kills [34, 35].

69 The Mungalla wetlands east of Ingham, on the north Queensland coast, are characteristic of  
70 the many degraded intertidal wetlands adjacent to the Great Barrier Reef lagoon [32]. The  
71 degradation began after an earth bund was constructed in the mid-1940s, initially to provide  
72 access across the wetlands [36], which excluded seawater and created a ponded pasture for  
73 grazing [21]. A short time later para grass (*Urochloa mutica*) was introduced into the  
74 freshwater ponded area, which formed above the bund. Para grass was introduced into  
75 Queensland in 1884 for improving river bank stabilization [37] and has been used as ponded  
76 pasture in bunded areas of coastal marine plains since artificial ponding for grazing started in  
77 Queensland in the 1930's [38]. More recently two other ponded pasture species have been  
78 introduced - Olive Hymenachne (*Hymenachne amplexicaulis*) and Aleman grass (*Echinochloa*  
79 *polystachya*). These two species were introduced into Queensland in 1988 [39] despite  
80 apparent warning of possible weedy invasion by the Queensland Environmental Protection  
81 Agency [40, 41]. Subsequently the two grasses have been recognized as weeds regionally,  
82 with Olive Hymenachne being declared a weed of national significance (WONS) 10 years after  
83 release [42]. Aside from the pasture introductions, two other nationally declared weeds are  
84 present in the wetlands, *Salvinia* (*Salvinia molesta*), and Water hyacinth (*Eichhornia*

85 *crassipes*), both of which are spread by spore/seed or asexually through fragmentation. Weed  
86 growth and expansion into the wetland was exacerbated by Palm Creek carrying nutrients  
87 downstream from a large area of sugar cane and a sugar mill [32]. In response, the Mungalla  
88 Wetland Management Strategy [43] prescribed weed control using aerial and ground based  
89 application of chemical herbicides in the first instance with the possibility of exploring bund  
90 removal. The initial efforts were expensive and ecologically undesirable as freshwater weed  
91 removal was partial and short-lived. With the limited success of the chemical weed control, it  
92 was decided to investigate bund removal as a natural form of weed control using tidal ingress  
93 from the seaward side of the wetland. There was however, some uncertainty around the  
94 frequency, duration and extent of seawater penetration into the wetland once the bund was  
95 removed. Hydro-dynamic modelling simulations by Karim *et al.*, [44] predicted that large  
96 (king) tides occurring in December/January and June/July each year should penetrate  
97 upstream of the existing bund. However, these simulations took no account of the impact of  
98 different depths of standing water within the wetland, which could form a hydrological barrier  
99 to, and potentially inhibit, on-going ingress of seawater. Despite these uncertainties it was  
100 decided to remove sections of the earth bund wall.

101 This paper gives an overview of the changes in weed infestation, fish biodiversity and detailed  
102 monitoring of the depth and quality of the water within the wetland for 1 year before, and 4  
103 years following reinstatement of tidal flow into the Boolgooroo lagoon region of the Mungalla  
104 wetlands complex, North Queensland (Fig 1). We assess the success of the intervention in the  
105 context of the local (Mungalla) wetland management strategy [43] which specifically targeted  
106 weed removal, and explore the broader implications of this management strategy for coastal  
107 wetland restoration.

108

109 **Fig1. Location of wetlands within Mungalla station in the lower Herbert River catchment,**  
110 **Queensland, Northern Australia.** The Mungalla wetlands are shown in light grey, the  
111 Boolgooroo region of the wetland complex is shown in yellow. Also shown are the locations  
112 of the logger sites above and below the earth bund which was removed on 6<sup>th</sup> October 2013.

113

## 114 **Methods**

### 115 *Location and climate*

116 Mungalla Station (146°16'19"E , 18°42'55"S), is a 830 ha property located in the lower part of  
117 the Herbert River catchment south east of Ingham, North Queensland (Fig 1). Mungalla  
118 station has been run as a cattle-grazing enterprise for over a century, and since 1999 by the  
119 Nywaigi Aboriginal people, who also manage the wetland area. Until its removal on 6th  
120 October 2013 the wetland area above the bund was palustrine with saline estuarine wetland  
121 and saltmarsh below it. Typically saltmarsh would merge into intertidal grass-sedge wetlands  
122 dominated by Bulkuru (*Eleocharis dulcis*) [45] - the common name Bulkuru originally derives  
123 from the indigenous Boolgooroo which is a clear indicator of the wetland's pre-European  
124 state. The Boolgooroo wetland covers an area of 60 ha of the total 160 ha Mungalla wetland  
125 complex (Fig 1). The wetland is bounded to the west by grazing lands and to the east by  
126 regrowth forest on coastal sand ridges. Mangroves and saltmarsh patches are present along  
127 the coast and to the south of the property, which is adjacent to the Great Barrier Reef lagoon.  
128 Inland, the surrounding catchment is dominated by sugar cane farms, with some areas of  
129 grazing.

130 The area has a wet tropical climate with highly variable seasonal and annual rainfall. The long  
131 term mean rainfall at nearby Allingham is 2060 mm and is strongly seasonal with 85% falling

132 in the six wettest months, November to April. Temperatures are highest in December (daily  
133 average 29.1°C) and lowest in July (daily average 20.4°C), with high humidity (~63 - 77%)  
134 throughout the year.

135 Because of the highly seasonal rainfall, freshwater only enters the wetland in the wet season  
136 as direct rainfall input, runoff from the surrounding sub-catchments and overbank flow from  
137 Palm Creek, which runs along the western boundary of Mungalla station. Once the bund was  
138 removed, the upstream wetland was again connected to the coastline, with the possibility of  
139 being fed tidally with seawater from a tributary of Palm Creek (just south of Forrest Beach)  
140 and Cassady Creek (Fig 1).

141

#### 142 *Vegetation monitoring*

143 Vegetation monitoring and mapping in the wetland was carried out using Worldview-3 8-band  
144 satellite imagery (DigitalGlobe Inc. Longmont, CO, USA) pan sharpened to a resolution of  
145 0.31m. Imagery was collected once each year between August and September over the  
146 Mungalla station region, then cropped to an extent around the Boolgooroo wetland (Fig 1).  
147 Classification of the imagery into major vegetation types was carried out using object-based  
148 image classification techniques [46], using nearest neighbour supervised classification, and  
149 manual classification in more difficult areas. Complexity of the wetland area required  
150 separate classification of small regions, incorporating different segmentation levels within the  
151 object-based process, which were later merged. To enable the supervised and manual  
152 classification, dominant species were recorded at 50 fixed ground truthing sites across the  
153 imagery extent each year. In addition, high-resolution aerial photography was obtained with  
154 a Go-Pro camera attached to the underside of a helicopter flying along several transects that  
155 ran parallel and across the wetland site from west to east and at an elevation of approximately

156 100 m. These images were geo-referenced to preselected ground control points (geo-located  
157 with a differential GPS). Major vegetation groups could be clearly identified visually from the  
158 high-resolution aerial photography which was used as further ground truth in classification of  
159 the Worldview-3 imagery. A comparison of final classification imagery was carried out  
160 between consecutive collection dates (Aug/Sep yearly), to identify differences in the area  
161 inhabited by these major vegetation groups.

162

### 163 *Water depth and quality measurements*

164 Wetland water depth, temperature and electrical conductivity were monitored by loggers  
165 (CTD-Diver, Eijkelkamp Soil & Water, The Netherlands) located in five permanent positions in  
166 the wetland, beginning on 24<sup>th</sup> October 2012. The locations are 450 m, 250 m and 50 m above,  
167 and also 50 m and 250 m below the bund wall (Fig 1). The above bund logger locations were  
168 all within the weed infested parts of the wetland. The loggers captured data from the bottom  
169 of the water column (10 cm above the soil surface) every 15 minutes and were downloaded  
170 as part of monthly routine maintenance visits. An additional water quality logger (Hydrolab,  
171 OTT Hydromet, Colorado, USA) was used above the bund at the 50 m location, adjacent to  
172 the Diver logger (Fig 1). The Hydrolab logger recorded values of electrical conductivity, depth,  
173 pH and dissolved oxygen concentration every 30 minutes at 10 cm above the soil surface.

174 Ancillary data used in conjunction with the above wetland monitoring data are daily rainfall  
175 measured at Allingham (Australian Bureau of Meteorology (BOM) station No 032117) and tide  
176 data recorded at the Lucinda Jetty; which was then interpolated to Forrest Beach; 1.5 km east  
177 of the wetland (4min offset). The tidal delay from the coast at Forrest Beach to the bund  
178 position is approximately 3 hours. Further details of the tidal interpolation method are given  
179 by Karim et al, [47].



180

### 181 *Fish biodiversity*

182 Prior to this project a fish survey was conducted in the wetlands using baited collapsible box  
183 traps along with cast nets, electrofishing, and visual observation. Sampling occurred at sites  
184 among the invasive vegetation [48]. For comparison we conducted another fish survey with  
185 the use of a boat mounted electrofisher (Smith-Root 2.5 GPP generator mounted vessel) in  
186 May 2016. In this second survey, approximately one third of the wetland was surveyed over  
187 a 55 min period, around fringing vegetation and woody debris (the remaining two thirds of  
188 the wetland were too shallow for the boat to access). All native fish were identified and  
189 immediately released after capture, while pest fish species were euthanised using accepted  
190 methods. Given the differences in the sampling methods before and after bund wall removal,  
191 the data presented represents a presence/absence of the catch records.

192

## 193 **Results**

### 194 **Before Bund removal**

#### 195 *Vegetation monitoring*

196 Prior to bund removal (2012/13), with no changes in EC above the bund, over two thirds of  
197 the area were inhabited with ponded pastures and exotic floating vegetation. A small  
198 percentage was inhabited by *Nymphaea gigantea*: a native water lily during 2012 which  
199 increased into open waters during 2013 (Table 1) (Fig 2(a,b)). Over half of the area was  
200 infested with weeds of national significance (WONS) (Table 1), dominated by *Hymenachne*  
201 *amplexicaulis* (Olive Hymenachne) and *Eichhornia crassipes* (*Water Hyacinth*). On average  
202 open water made up less than one fifth of the Boolgooroo area (Table 1).

203

204 **Table 1. Area inhabited by vegetation groups (%): pre- (2012/13) and post (2014 - 2017) bund**

205 removal.

| Satellite Classification<br>(% of Boolgooroo site)        | Survey Year |       |       |       |       |       |
|-----------------------------------------------------------|-------------|-------|-------|-------|-------|-------|
|                                                           | 2012        | 2013  | 2014  | 2015  | 2016  | 2017  |
| <b>Exotic aquatic plants</b>                              |             |       |       |       |       |       |
| Aleman grass†<br>( <i>Echinochloa polystachya</i> )       | 1.85        | 3.12  | 1.18  | 10.26 | 4.87  | 18.93 |
| Olive hymenachne*†<br>( <i>Hymenachne amplexicaulis</i> ) | 48.94       | 43.04 | 12.61 | 5.11  | 10.51 | 5.23  |
| Para grass†<br>( <i>Urochloa mutica</i> )                 | 13.26       | 6.45  | 4.24  | 15.16 | 6.83  | 10.42 |
| Salvinia*<br>( <i>Salvinia molesta</i> )                  | 2.41        | 2.61  | 0.04  | 0.00  | 40.53 | 10.12 |
| Water hyacinth*<br>( <i>Eichhornia crassipes</i> )        | 2.68        | 16.72 | 0.55  | 0.03  | 0.00  | 0.00  |
| <b>Native aquatic plants</b>                              |             |       |       |       |       |       |
| Bulkuru<br>( <i>Eleocharis dulcis</i> )                   | 0.00        | 0.00  | 0.00  | 11.46 | 0.26  | 2.59  |
| Club rush<br>( <i>Schoenoplectus litoralis</i> )          | 0.00        | 0.00  | 0.00  | 0.00  | 0.00  | 0.10  |
| Duck weed<br>( <i>Spirodela punctata</i> )                | 0.00        | 0.00  | 0.31  | 3.57  | 0.00  | 0.00  |
| Water lily<br>( <i>Nymphaea gigantea</i> )                | 2.66        | 10.16 | 3.31  | 14.07 | 12.91 | 17.54 |
| <b>Other</b>                                              |             |       |       |       |       |       |
| Open Water                                                | 24.56       | 13.38 | 73.71 | 36.38 | 20.56 | 31.70 |

206 \*Weeds of national significance, †Ponded pasture grasses.

207

208 **Fig 2. Changes in vegetation from 2012 to 2017.** The white outline in (a) represents the

209 Boolgooroo region on which change analysis was based. Charts on the bottom of the figure

210 represent changes in exotic/native vegetation and open water (colours correspond to the

211 classification key).

212

213 *Water depth and quality measurements*

214 Towards the end of 2012 wetland depth at all locations declined steadily with only 0 to 20 cm  
215 of water depth above the bund and even less (0 to 10 cm) below the bund (Fig 3a,b) by the  
216 middle of December 2012. Subsequent rainfall (Fig 3c) increased the wetland depth, which  
217 reached a maximum of ~170 cm (above and below the bund) at the end of January 2013. After  
218 February 2013, water levels dropped rapidly, and then more slowly as drainage from the  
219 wetland slowed. Smaller rainfall inputs to the wetland in March, April and May 2013 resulted  
220 in only modest increases in water depth (~ 10 cm). After this time water depth again dropped  
221 steadily, approaching zero in October 2013 just before the bund was removed. There were  
222 multiple occasions throughout the 2013 dry season when depth increased, at approximately  
223 monthly intervals, at 250 m and 50 m below the bund (Fig 3b). However, there was no  
224 corresponding increase in depth above the bund on any of these events (Fig 3a); it would  
225 therefore appear that the depth increases below the bund were due to tidal pulses and that  
226 these did not penetrate above the bund at this time.

227

228 **Fig 3. Changes in depth above and below the bund location and daily rainfall - October 2012**  
229 **to August 2017.** Logger distances above the bund (a) are 450 m, 250 m and 50 m and below  
230 (b) are 50 m and 250 m. The bund was removed on the 6<sup>th</sup> October 2013. Daily rainfall (c) was  
231 derived from the nearby Bureau of Meteorology station at Allingham approximately 2.5 km  
232 distant.

233

234 Seasonal variations in wetland electrical conductivity (EC) are shown in Fig 4a,b. Before  
235 removal EC above the bund was never greater than 0.5 mS cm<sup>-1</sup> (Fig 4a). During the same  
236 period there were 9 events where EC increased below the bund (Fig 4b), sometimes  
237 approaching seawater (~ 55 mS cm<sup>-1</sup>). Each event consisted of >=2 consecutive days of high

238 tides (Fig 4c). Tidal water reached the below 250 m location more often (9 times) compared  
239 to the below 50 m location (2 times), demonstrating that the gentle slope between the two  
240 locations is sufficient to reduce the frequency and duration of tidal water approaching the  
241 bund. The smallest tide to reach the below 50 m location was ~3.7 m, indicating that tides  
242 needed to be equal to or greater than this to reach the bund location.

243

244 **Fig 4. Changes in salinity above and below the bund location and tides  $\geq 3.7$  m - October**  
245 **2012 to August 2017.** Logger distances above the bund are 450 m, 250 m and 50 m and below  
246 are 50 m and 250 m. The bund was removed on the 6th October 2013. High tides ( $\geq 3.7$  m)  
247 are for Forrest Beach.

248

249 Dissolved oxygen (DO) (recorded 10 cm above the bottom of the wetland) was consistently  
250 close to zero before the bund was removed and pH showed little variation prior to bund  
251 removal being slightly acidic averaging ~6 (Fig 5a,b). Temperature showed little diurnal  
252 oscillation at this time (Fig 5b).

253

254 **Fig 5. Seasonal changes in dissolved oxygen, pH and temperature.** Daily average dissolved  
255 oxygen (% saturation) and pH were recorded by the Hydrolab logger at the above 50 m  
256 location (a). Daily average water temperatures shown are as measured 250 m above the bund  
257 location (b). Diurnal oscillations in dissolved oxygen (30-minute intervals) and water  
258 temperature (15-minute intervals) are also shown (a), (b).

259

260 *Fish biodiversity*

261 The fish community in Mungalla wetland prior to bund wall removal was of low abundance  
 262 and diversity in comparison with other coastal freshwater wetlands in the region [49], with  
 263 only three species recorded (Empire gudgeon, *Hypseleotris compressa*; Eastern rainbow fish,  
 264 *Melanotaenia splendida inornata*; the invasive Mosquitofish, *Gambusia holbrooki*) despite  
 265 sampling efforts comprising a combination of cast nets, bait traps, electrofishing and visual  
 266 observation [48] (Table 2). The most abundant species was the empire gudgeon (*Hypseleotris*  
 267 *compressa*), which is widespread in the region owing to a diadromous movement ecology  
 268 where it migrates to access upstream and downstream river areas [50]. The high abundance  
 269 of the empire gudgeon suggests either it is capable of circumventing the earth bund wall,  
 270 and/or it can tolerate poor water quality, as has been the case in the wetlands prior to bund  
 271 wall removal.

272

273 **Table 1: Fish community composition in the Mungalla wetland (Boolgooroo) before bund**  
 274 **removal in 2009 and following removal in 2016.**

| Common name<br>Species                              | Pre bund removal survey<br>(2009) | Post bund removal survey<br>(2016) |
|-----------------------------------------------------|-----------------------------------|------------------------------------|
| Mosquitofish<br><i>Gambusia holbrooki</i>           | ✓                                 | ✓                                  |
| Hardyhead<br><i>Craterocephalus stercusmuscarum</i> |                                   | ✓                                  |
| Empire gudgeon*<br><i>Hypseleotris compressa</i>    | ✓                                 | ✓                                  |
| Tarpon<br><i>Megalops cyprinoides</i>               |                                   | ✓                                  |
| Rainbowfish<br><i>Melanotaenia splendida</i>        | ✓                                 | ✓                                  |
| Barramundi*<br><i>Lates calcarifer</i>              |                                   | ✓                                  |
| Silverbidy*<br><i>Gerres subfasciatus</i>           |                                   | ✓                                  |
| Banded scat*<br><i>Selenotoca multifasciata</i>     |                                   | ✓                                  |
| Long finned eel*<br><i>Anguilla reinhardtii</i>     |                                   | ✓                                  |
| <b>Total</b>                                        | 3                                 | 9                                  |

275 \*diadromous movement ecology

276

## 277 **After Bund removal**

### 278 *Water conductivity and effects on vegetation*

279 Following bund removal (6<sup>th</sup> October 2013), re-establishment of connectivity to Cassady creek  
280 was immediately evident with slow freshwater outflow over 12 days to reach an equilibrium  
281 depth of ~10 cm lower than the bunded state. Water and vegetation condition of the wetland  
282 remained unchanged for the following 3 months.

283

284 In January 2014 the wetland experienced the first tides over 3.7 m (3.8 and 3.7 m) which did  
285 not affect the wetland above the bund location, these were followed by 5 tides over 3.7 m at  
286 the end of the month (Fig 4c). These tides were unusually high due to a severe tropical low in  
287 the Coral Sea at that time. As a result, the wetland became influenced by tidal ingress ( $> 46$   
288  $\text{mS cm}^{-1}$ ) and remained so for the next 10 days before rainfall again suppressed conditions  
289 (Fig 3a,c). Conductivity levels remained brackish ( $> 1 < 46 \text{ mS cm}^{-1}$ ) for the next 7 days before  
290 returning to freshwater ( $< 1 \text{ mS cm}^{-1}$ ). In 2014 there were 7 tidal periods (most with 3  
291 consecutive tides over 3.7m) that affected the wetland. The wetland retained tidal water  
292 signal for an average of 10 days, becoming brackish for an average of 118 days. Three of these  
293 tidal periods were recorded at the 450 m above bund location.

294

295 The effect of increased EC on the ponded grasses and weeds was noticeable from a few days  
296 after the first tidal ingress at the end of January 2014, with a rapid yellowing of the vegetation  
297 occurring. Weed death continued after this and by the time of the next remote vegetation  
298 survey in August 2014 ponded grasses and other exotic species had been greatly reduced to

299 below 20% within the tidally effected area (Table 1). *Nymphaea gigantea* also decreased by  
300 two thirds at this point (Fig 2c; Table 1). A dramatic change is evident (Fig 2c) with most of the  
301 exotic vegetation being replaced by open water.

302 The following year (2015) saw 4 tidal periods over 3.7 m with the wetland becoming more  
303 saline for an average of 13 days and then brackish for 178 days, again with 3 periods being  
304 recorded at the 450 m above bund location. 2015 was the driest year on record for the region,  
305 which accounts for the differences in tidal inundation (days), as wetland depth and associated  
306 freshwater outflow did not restrict tidal inflow to the same degree as the previous year.

307 Satellite imagery recorded an increase in two of the ponded pastures - Aleman (*E.*  
308 *polystachya*) and Para grass (*U. Mutica*) - invading areas previously inhabited by Olive  
309 Hymenachne (*H. amplexicaulis*) this occurred on the wetland margins and comprised ~25% of  
310 the site (Fig 2d, Table 1). Olive Hymenachne was reduced to ~5% with Salvinia and Water  
311 Hyacinth being undetectable on the remote sensing imagery (Fig 2d) (Table 1). There was an  
312 increase in native aquatic plants driven by the appearance of *Eleocharis dulcis* (Bulkuru) within  
313 the lower half of the site as well as an increase in *N. gigantea* in the upper site. *Spirodela*  
314 *punctata* (Duck weed) was also present (~3.5%) in some of the shallower areas originally  
315 inhabited by *H. amplexicaulis*. The native species generally took advantage of the  
316 disappearance of exotic species and newly available open water.

317 Water quality showed improvements post weed removal (Fig 5a). pH (6.5 – 8.4) and DO (60 –  
318 120 % saturation) were most frequently maintained within ranges expected in wetlands in  
319 the region [49]. The improvements in DO seen here are similar to those found by Perna and  
320 Burrows [51] following mechanical removal or water hyacinth mats in the lower Burdekin  
321 region of north Queensland. There were still short periods where oxygen fell below acute and

322 chronic thresholds for biota [52] however, none were as low or lasted as long as seen prior to  
323 bund removal. Two occasions were recorded in early 2015 when pH became acidic (~3.4)  
324 which could adversely affect survival of aquatic biota, the most likely cause was leaching of  
325 sulphuric acid following oxidation of acid sulphate soils after drying out in the upper  
326 Boolgooroo at the end of 2014. These levels were short lived and pH was restored to an  
327 average of ~7.4 after buffering by further tidal intrusion and rainfall.

328 The entire wetland dried out in October 2015 remaining dry for two months (Fig 3a) and then  
329 received small flushes of rainfall until March 2016 (pH as low as ~3 again occurred due to acid  
330 sulphate soil oxidation and leaching). At this time, as a result of increased wetland  
331 accessibility, predation by feral pigs removed most of the Bulkuru (*E. dulcis*), a common and  
332 damaging event in northern Australia [53-55].

333 Although there was a single high tide of ~3.7 m in February of 2016 it did not enter the  
334 wetland (Figure 4a,c). Similarly, this also occurred in early January of 2014 indicating that not  
335 only is ~3.7 m is the lower limit for tidal flow into the wetland it will only occur when there  
336 are 2-3 consecutive tides above this level or when freshwater depth and outflow is very low  
337 as in January of 2015. There was a large amount of rainfall during March of 2016 with constant  
338 rainfall input until July. The wetland remained as freshwater until September/December  
339 when tidal water reached upstream areas of the bund wall, resulting in small conductivity  
340 peaks. 2016 also saw the return of *S. molesta* (~40% of the area) most likely due to the  
341 prolonged period without tidal input, invading open water and the areas previously inhabited  
342 by *E. dulcis* and *N. gigantea* in the upper reaches (Fig 2e). *E. polystachya* and *U. mutica* were  
343 reduced slightly from the margins to be replaced by *H. amplexicaulis*. Whilst some of the area  
344 occupied by *N. gigantea* were now used by *Salvinia*, the water lily had become denser (Fig 2e)



345 and remained stable at around ~13% of the Boolgooroo area (Table 1). *E. dulcis* was no longer  
346 detectable on the imagery after the feral pig predation event of 2016, however some  
347 individual plants were observed in the lower Boolgooroo area at this time. pH dropped to ~3  
348 during the rainfall period in March following on from the dry out that happened in late 2105  
349 – indicating again that the lowering of pH is a product of acid sulphate soil oxidation and  
350 sulphuric acid release on wetting, it then maintained an average of around 6.5 for the  
351 remainder of the year (Figure 5a). Available DO dropped to close to zero after the March 2016  
352 rainfall, most likely due to the rapid increase of *Salvinia* – growth of which may have been  
353 accelerated due to the low pH levels [56]. Mats of *Salvinia* typically lower oxygen levels by  
354 inhibiting oxygen transfer across the water surface. This occurs in particularly slow flowing  
355 situations such as those seen in the Mungalla wetland [57-59].

356 In the final 7 months of the study (2017) 3 tides affected the wetland, but only to the above  
357 50 m location (Figure 4a) although the spikes in EC from September and December 2016 tides  
358 could be considered here in regards to vegetation change as tidal input during this period was  
359 observed to drastically reduced the population of *Salvinia*, which is particularly sensitive to  
360 even low levels of salinity [60, 61]. The 2017 image classification (Fig 2f) clearly shows the  
361 reduction in *Salvinia* to marginal locations with *N. gigantea* moving into the areas that it  
362 previously occupied in the upper Boolgooroo, and *Bulkuru* reappearing in the lower  
363 Boolgooroo. At this time the saltmarsh species *S. littoralis* (Club rush) appeared in a small area  
364 (Table 1) directly above eastern end of the bund location (Fig 2f). Ponded grasses, which had  
365 remained on the wetland margins since 2014, showed a decrease in *H. amplexicaulis* down to  
366 ~5%, similar to the 2015 level and may represent the effective control extent of tidal intrusion.  
367 Growth of *U. mutica* and *E. polystachya* increased to inhabit areas previously occupied by *H.*  
368 *amplexicaulis* in 2016, with the increase by Aleman grass (*E. polystachya*) even more

369 pronounced in this period. Typical of the coastal seawater, pH rose to a level just below 9  
370 following the tidal inflow of September 2016 to February 2017, it then gradually fell to ~7.5  
371 in May of 2017, dissolved oxygen reached a maximum level of ~100 % saturation during the  
372 period between November 2016 and May 2017 coinciding with rainfall events, however, the  
373 average DO was ~2 % saturation with many readings close to or at zero. Unfortunately, both  
374 loggers below the bund location stopped recording correctly around February of 2017, and  
375 the Hydrolab failed in May of 2017 (Fig 3b,4b,5a) – data collection from those loggers was  
376 discontinued at those points.

377

#### 378 *Dissolved oxygen and water temperature*

379 Dissolved oxygen saturation (recorded 10 cm above the bottom of the wetland) was  
380 consistently close to zero before the bund was removed (Fig 5a). However, in the first wet  
381 season after its removal, DO improved following the first series of seawater pulses that  
382 entered the wetland in January and February 2014 (Fig 4c), reaching ~ 100% saturation on  
383 most days (Fig 5a). DO declined again for several weeks after this until the freshwater pulses  
384 in March and April 2014 (Fig 3a) again improved DO; however, initially there were relatively  
385 few days when DO reached 100% saturation. By June and July 2014 DO improved further,  
386 approaching 100% saturation on many days. As wetland depth dropped below 50 cm in  
387 August and September 2014, the seawater pulses that could now enter the wetland  
388 continued to sustain reasonably high DO, and there was even a supersaturated spike (~ 200%)  
389 in DO about two weeks after the seawater ingress in August 2014. Despite the low water  
390 levels in January and February 2015, DO concentrations reached 80 to 100% on most days,  
391 however much lower DO was recorded during March, April and May 2015.

392 Water temperature in the wetland varied seasonally, being coolest in June/July (~ 22.5°C) and  
393 warmest in January/February (~ 29.5°C) (Fig 5b). Water temperatures at the three locations  
394 above the bund were very similar, but the water was slightly warmer (by ~ 1°C) below it. Daily  
395 average water temperatures in 2014 to 2017 were similar to those recorded in 2012/2013  
396 before bund removal. The highest temperatures were recorded in January/February 2015,  
397 averaging ~31°C above the bund location, compared to ~29°C and ~29.5°C in the two previous  
398 summer seasons, and by ~30 °C and ~29 °C in the following two seasons. The higher  
399 temperatures in 2015 coincided with the low rainfall received that summer season, leaving  
400 the wetland very shallow, averaging only 11 cm above the bund location in January and  
401 February (Fig 3a).

402 Water temperature also varied diurnally, generally by 1 to 3 degrees, but there were also  
403 notable periods when the diurnal oscillations increased to > 10 degrees; for example, during  
404 the period October 2013 to January 2014 and for most of the 2014-16 seasons and again  
405 during the summer months in 2016/17 (Fig 5b). Large diurnal oscillations in temperature  
406 coincided with periods of shallow wetland depths. The size of the diurnal oscillation is  
407 important as it defines how long aquatic species in the wetland are exposed to the highest  
408 water temperatures during the afternoon.

409 The thermal regimes 250 m above and 250 m below the bund are compared in (Fig 6). These  
410 plots show how often water temperature exceeded a given temperature threshold and are  
411 compiled from all 15-minute recordings made from the warmest time of the year in January,  
412 February and March (JFM) 2013 (before bund removal) and the same three months in 2014  
413 and the driest year 2015 (after bund removal).

414

415 **Fig 6. The percentage of time water temperature exceeded any given temperature**  
416 **threshold during the warmest months (January, February and March) in the Mungalla**  
417 **wetland (Boolgooroo).** (a) compares the temperatures 250 m above (black) and 250 m below  
418 (grey) the bund before it was removed. (b) compares the temperatures 250 m above the bund  
419 before (black) and after (2014; short-dashed black; 2015; long-dashed black) it was removed.  
420 The exceedance of threshold  $T_{pref} = 31^{\circ}\text{C}$  is also shown

421  
422 Water above the bund was above  $26^{\circ}\text{C}$  during JFM 2013, but rarely exceeded  $32^{\circ}\text{C}$  (Fig 6a).  
423 Water was warmer below the bund during this period, reaching  $35^{\circ}\text{C}$ . The exceedance of the  
424 preferred temperature threshold for some tropical freshwater fish (see [62]),  $T_{pref} = 31^{\circ}\text{C}$ , was  
425 much higher below the bund (23% of the time) compared with above the bund (6.9% of the  
426 time). Comparison of 2013 and 2014 thermal frequency curves (Fig 6b) shows that bund  
427 removal *per se* did not markedly affect the wetland thermal regime. However, water  
428 temperature was very dependent on (shallow) wetland depths, which were mainly  
429 determined by the timing and amount of wet season rainfall. This was the situation in the  
430 2014/15 season where the low rainfall led to shallow wetland depths (Fig 3a). As a result,  
431 diurnal temperature oscillations were very high (Fig 5b) and led to prolonged periods of high  
432 temperature, as shown by the temperature frequency curve for JFM 2015 (Fig 6b). For  
433 example, the exceedance of the temperature threshold  $T_{pref} = 31^{\circ}\text{C}$ , was 61% in JFM 2015,  
434 compared with 7.3% and 6.9% in 2014 and 2013 respectively. Temperatures never exceeded  
435  $34^{\circ}\text{C}$  in 2013 and 2014, but this temperature was exceeded 34% of the time in 2015, and even  
436 approached  $40^{\circ}\text{C}$  at times.

437

438 *Fish Biodiversity*

439 Post bund removal fish surveys conducted in May 2016, found the same three species  
440 identified before bund removal with an additional six species recorded. While species count  
441 is still low by local standards [49], the increase in species number has presumably been the  
442 result of reconnecting the wetlands with the downstream estuary. This along with the  
443 removal of aquatic weeds and associated improvements in pH and dissolved oxygen has  
444 allowed more species to access and live in the wetland area. Increases in fish community  
445 richness have been recorded elsewhere in the region following aquatic weed removal [35].  
446 The most notable records in the post bund survey were barramundi (*Lates calcarifer*), silver  
447 biddy (*Gerres subfasciatus*) and banded scat (*Selenotoca multifasciata*); each of these species  
448 have a diadromous movement ecology, requiring access to wetlands to fulfil critical life cycle  
449 stages.

450

## 451 **Discussion**

452 The restriction of seawater from coastal wetlands using earth bunds (e.g. dams, dykes or  
453 levees) is widespread and has been seen to cause the degradation and/or loss of salt marsh  
454 ecosystems worldwide [3, 9, 63]. Prolonged exclusion of seawater leads to the loss of native  
455 halophytes and widespread invasions of freshwater species, in addition to major changes in  
456 sedimentation rates and soil chemistry [64]. Recognition that these banded wetlands are not  
457 natural has led to an increasing number of tidal restoration projects [9]. For example, Smith  
458 *et al.*, [65] describe how freshwater plants are being replaced by native salt marsh plants  
459 following the restoration of tidal flows to the Hatches Harbor salt marsh in Cape Cod,  
460 Massachusetts, USA. In Australia, tidal flows were reinstated into coastal wetlands in the  
461 Hunter estuary in New South Wales and this increased the area of salt marsh, largely through

462 expansion into areas of pasture [27]. Conversely seawater intrusion into coastal wetlands  
463 such as the Gippsland lakes in Victoria [66] and the rivers in the Northern Territory [67] has  
464 also caused changes in wetland ecology, however, these are generally seen as undesirable,  
465 since in these cases they changed the wetlands from their natural freshwater state. These  
466 salinization effects are reported worldwide and are attributed to a range of anthropogenic  
467 impacts including sea level rise [68]. In the case of the Boolgooroo wetland on Mungalla  
468 station the removal of the earth bund and subsequent reintroduction of tidal water ingress,  
469 returning the wetland to its historical halophytic state was a desirable outcome, where it  
470 would receive occasional tidal pulses, enough to assist with naturally suppressing invasive  
471 aquatic freshwater plant species.

472  
473 Seawater entry into the Mungalla wetlands does not occur often since, with the bund  
474 removed, only the highest of tides, of approximately 3.7 m, are able to penetrate the wetland.  
475 These usually occur in sequences of 2 to 4 consecutive days on around four occasions during  
476 the summer (December to March) and a similar number in winter (June to September).  
477 However, if the wetland contains water deeper than ~ 0.5 m a 'hydraulic barrier' is formed  
478 meaning that tides effectively need to be greater than 3.7 m to penetrate the wetland  
479 upstream of the bund wall location. This may not happen frequently as tides in excess of 4.0  
480 m only occur about once a year. Seawater ingress is therefore more likely to happen when  
481 the wetland depths are lowest, either during winter or in years of low summer rainfall (which  
482 were experienced during the research program here). However, when hydraulic pressure is  
483 low during low rainfall years and in the pre-summer period the frequency and duration of  
484 seawater ingress to the Boolgooroo region of the Mungalla wetland can exceed that required  
485 to cause permanent damage to the invasive freshwater weeds. Salinity tolerance tests carried

486 out by Reid et al., [69] found that the growth and survival of Aleman grass (*Echinochloa*  
487 *polystachya*), Olive Hymenachne (*Hymenachne amplexicaulis*), Para-grass (*Urochloa mutica*)  
488 and Water hyacinth (*Eichhornia crassipes*) were all affected by changes in EC, even when  
489 exposed to only 30% seawater concentration for as little as a single day. Although tolerance  
490 varied between these four weed species (Aleman grass being most tolerant), each had  
491 stopped photosynthesis and mortality rates were very high when exposed to 100% seawater  
492 equivalent for longer than 7 days. Clearly removal of the earth bund allowed seawater to  
493 penetrate well into the wetland on multiple occasions creating saline conditions that would  
494 be expected to have a marked impact on the freshwater adapted weeds found above the  
495 bund location. Indeed, surveys of the wetland vegetation before and after the removal of the  
496 bund show that there was a large and relatively rapid reduction in freshwater weeds above  
497 the bund location, with the re-emergence of native salt tolerant plants after only 2-3 years.  
498 However, since wetland depth and tidal height conditions required to change the wetland  
499 vegetation towards a more halophytic composition may only occur in the driest of years (as  
500 in 2015), or during dry pre-summer conditions, there is a risk of the wetland reverting to  
501 dominance by invasive freshwater species. In fact, this occurred in 2016 with an initial re-  
502 invasion of the floating species *S. molesta* (*Salvinia*) followed by some encroachment of  
503 ponded pastures from the wetland margins. Of great interest, following saltwater ingress, has  
504 been the expansion of Aleman grass (*E. polystachya*), being the most tolerant to saline  
505 conditions [69], which will most likely continue to dominate from the wetland margins  
506 inwards, replacing Para grass (*U. mutica*) and Hymenachne (*H. amplexicaulis*) when conditions  
507 are suitable.

508 Fish biodiversity increased after bund removal, occurring as a result of amended connectivity  
509 between the wetland and the ocean and improved water quality conditions. The very poor

510 water quality in the wetland, especially the extremely low dissolved oxygen which would  
511 regularly expose, such as fish (and other aquatic fauna), to acute and chronic hypoxia risks led  
512 to low fish numbers in the wetland prior to bund removal. The low oxygen levels before bund  
513 removal were likely to have been due to the presence of the dense mat of freshwater weeds  
514 that limited oxygen transfer and light penetration to the bottom of the wetland. Butler and  
515 Burrows [52] found that there were significant risks of acute exposure when DO was below  
516 30% saturation (the 'acute trigger value' ATV). Prior to bund removal hypoxia risks were  
517 severe, as DO was below the ATV threshold virtually 100% of the time. With the earth bund  
518 removed, DO gradually increased in the first wet season (2013/14), but still fell below the ATV  
519 for 93% of the time. The improvement in DO was more dramatic following the 2014 dry  
520 season, where DO only fell below the ATV for 49% of the time. Given the normal diurnal  
521 cycling of DO at the bottom of a wetland [70], these latter trigger value failures should not  
522 present a high risk to fish that can swim towards the surface where DO would be higher [71].  
523 An aquatic ecology survey of the Mungalla wetlands completed 4 years before the bund was  
524 removed [71] found that the weed infested sections of the wetland did not provide suitable  
525 habitat refugia for most fish species, and created conditions that increase the wetlands'  
526 susceptibility to acute episodic periods of low dissolved oxygen. That study also showed that  
527 water quality was better in 'open' (weed free) parts of the wetland. This was probably the  
528 habitat (22% of the wetland area) where the few species of fish (3 species) existed at that  
529 time (May 2009). Reduction of wetland depth following bund removal may also pose a risk  
530 to wetland biota via its effect on water temperature. Water temperatures recorded above  
531 the Mungalla bund location did not exceed 34°C either before (2013) or after (2014) removal.  
532 Therefore, bund removal *per se* did not affect the wetland thermal regime. However, when  
533 water depths were very shallow (< 40 cm), as in the 2015 wet season, due to the very low



534 rainfall in that year, temperatures exceeded 31°C over 60% of the time, 34°C for 35% of the  
535 time. These higher temperatures could have had a major impact on freshwater aquatic  
536 species, if trapped within the wetland, as many tropical fish [72] and freshwater crustaceans  
537 [73, 74] cannot survive prolonged exposure to such high temperatures. However, with  
538 connectivity improved via bund removal and a reduction of weed species, aquatic biota could  
539 move to other parts of the wetland or adjacent creeks during these periods. This is also true  
540 for the short periods of low pH when the wetland water became acidic (pH 3 - 3.5), reaching  
541 conditions that could be lethal for aquatic invertebrates and could even kill fish [75, 76]. These  
542 conditions follow periods of drought, when the acid sulphate soil in the wetland is exposed  
543 to air, releasing a pulse of sulphuric acid [77] when the wetland is initially reflooded by fresh  
544 or saline waters. Interestingly, if high tides continue to occur during these periods of low  
545 wetland depth, the alkaline seawater ingress can eliminate the acidic conditions; which would  
546 not have occurred when the wetland was bunded. However, the buffering of saltwater  
547 potential has been shown to contribute to secondary implications, including the precipitation  
548 of heavy metals that are available in the water column [8].

549

550 Freshwater weed infestation is widespread in many of the coastal wetlands in North  
551 Queensland [32, 35], the primary control mechanisms are aerial spraying with herbicide and  
552 mechanical removal [35, 78]. However, these methods are expensive, can have undesirable  
553 ecological consequences and only effective for a limited time. In some cases, these methods  
554 have been shown to have little to no impact (Hurst and Boon, 2016). For example, in the years  
555 before bund removal on Boolgooroo chemical spraying with herbicide did increase the open  
556 water area, but this mitigation measure provided only a temporary solution with aquatic  
557 weeds such as Olive hymenachne again present only 2-3 months after spraying and Aleman

558 grass largely unaffected most likely due to herbicide resistance at the application rates used  
559 [79]. Although spraying with more ecologically acceptable saline water has been attempted  
560 for control of Water hyacinth [80] it is not yet widely used for freshwater weed control. With  
561 approximately 30% of coastal wetlands being bunded in the Great Barrier Reef region [81],  
562 removal of an earth bund or levee could provide a more cost effective and sustainable means  
563 of controlling freshwater weeds and improving water quality. However, landholders and  
564 government do still need to take care to fully consider tidal boundary laws and amendments  
565 when considering ponded pasture reconversion projects [82].

566

## 567 **Conclusions**

568 With the limited success of control methods to restore wetlands as productive coastal  
569 features in the Great Barrier Reef catchment area, this study revealed that reinstatement of  
570 tidal flows into bunded estuarine wetlands is relatively effective in the removal of freshwater  
571 weeds and ponded pastures. As a passive remediation method reintroduction of tidal flow is  
572 a sustainable, efficient and cost-effective management option for restoring aesthetic and  
573 ecological values of coastal wetlands. Surprisingly, gross changes towards a more natural  
574 system occurred within a relatively short timeframe. The reappearance of native vegetation,  
575 Water lilies and Bulkuru, improvements in water quality and fish biodiversity took less than 3  
576 years. However, the weight of evidence presented here after 5 years of monitoring, shows  
577 that the abundance of native and invasive plant species appears to oscillate depending on  
578 seasonal rainfall which can induce hydrologic pressure to repress tidal water ingress, which in  
579 turn drives dissolved oxygen and temperature regimes (through vegetation and depth  
580 changes) within the wetland, effecting fish occupancy. These changes are modelled

581 conceptually in Fig 7, describing what is happening on the Mungalla wetland post-bund  
582 removal, showing the oscillation or cycle between freshwater and saltwater tolerant plant  
583 species, associated water quality, and fish presence, concomitant with the preceding years'  
584 weather conditions (primarily summer rainfall).

585

586 **Fig 7. Conceptual model showing changes due to seasonal oscillations within the shallow**  
587 **Boolgooroo region of the Mungalla wetlands.** This oscillation/cycle is likely to occur on other  
588 shallow wetlands if this method of passive remediation is employed.

589

590 Variation in wetland salinity and subsequent species and water quality variation may be an  
591 effect in the shorter term with the wetland reaching an equilibrium similar to other local  
592 natural estuarine wetlands in the longer term, i.e. Bulkuru dominant toward the seaward end  
593 of the wetlands along with other saltmarsh adapted species. Vegetation in the upper reaches  
594 will most likely remain primarily freshwater adapted species, with tidal influence in only very  
595 dry years (such as 2015). A particularly interesting outcome from this research has been the  
596 replacement of other ponded pastures by Aleman grass (*Echinochloa polystachya*). Aleman  
597 grass appears to be tolerant of marginally brackish conditions – giving it the ability to reinvade  
598 on years of lower tidal ingress, and has already shown some herbicide resistance [79]. Further  
599 research is necessary to understand more around the effects of saltwater impact on Aleman  
600 grass, including a combination of herbicide and seawater treatment, as removal of this grass  
601 may become the next challenge.

602 Whilst reinstatement of tidal flow has been successfully applied elsewhere to restore  
603 ecological function, this study appears to be the first of its kind targeting wetland weeds and  
604 specifically ponded pastures in the Great Barrier Reef region, and as such is an important case

605 study for similar restoration efforts needed to effect reef water quality and the Australian  
606 government's plan of coastal wetland restoration and protection under the Reef 2050  
607 plan[83].

608

## 609 **Acknowledgements**

610 The authors would like to acknowledge and thank the Traditional Owners, the Nywaigi  
611 people, for allowing this important project to be sited on Mungalla and for having the desire  
612 to rehabilitate their country. A special thanks to Mr J. Cassady, who encouraged and  
613 supported this project, we also acknowledge the important role Dr T. Grice has had in the  
614 establishment and conduct of the scientific monitoring. Thanks to Mr B. Butler for discussions  
615 on thermal and hypoxia tolerances on wetland aquatic species.

## 616 References

617

- 618 1. Barbier E, B., Hacker SD, Kennedy C, Koch EW, Stier AC, Silliman BR. The value of  
619 estuarine and coastal ecosystem services. *Ecol Monogr*. 2011;81:169–93.
- 620 2. Lee SY, Dunn RJK, Young RA, Connolly RM, Dale PER, Dehayr R, et al. Impact of  
621 urbanization on coastal wetland structure and function. *Austral Ecology*. 2006;31:149-63.
- 622 3. Barbier EB, Hacker SD, Kennedy C, Koch EW, Stier AC, Silliman BR. The value of  
623 estuarine and coastal ecosystem services. *Ecological Monographs*. 2011;81(2):169-93.
- 624 4. Lee S, Dunn R, Young R, Connolly R, Dale P, Dehayr R, et al. Impact of urbanization on  
625 coastal wetland structure and function. *Austral Ecology*. 2006;31(2):149-63.
- 626 5. Rodríguez JF, Saco PM, Sandi S, Saintilan N, Riccardi G. Potential increase in coastal  
627 wetland vulnerability to sea-level rise suggested by considering hydrodynamic attenuation  
628 effects. *Nature communications*. 2017;8:16094.
- 629 6. Waltham NJ, Sheaves M. Expanding coastal urban and industrial seascape in the Great  
630 Barrier Reef World Heritage Area: Critical need for coordinated planning and policy. *Marine*  
631 *Policy*. 2015;57:78-84.
- 632 7. Murray NJ, Phinn SR, DeWitt M, Ferrari R, Johnston R, Lyons MB, et al. The global  
633 distribution and trajectory of tidal flats. *Nature*. 2019;565(7738):222.
- 634 8. Luke H, Martens MA, Moon EM, Smith D, Ward NJ, Bush RT. Ecological restoration of  
635 a severely degraded coastal acid sulfate soil: A case study of the East Trinity wetland,  
636 Queensland. *Ecological Management & Restoration*. 2017;18(2):103-14.
- 637 9. Gedan KB, Silliman BR, Bertness MD. Centuries of Human-Driven Change in Salt Marsh  
638 Ecosystems. *Annual Review of Marine Science*. 2009;1:117-41.
- 639 10. Howe AJ, Rodríguez JF, Spencer J, MacFarlane GR, Saintilan N. Response of estuarine  
640 wetlands to reinstatement of tidal flows. *Marine and Freshwater Research*. 2010;61:702-13.
- 641 11. Li F, Pennings SC. Response and Recovery of Low-Salinity Marsh Plant Communities to  
642 Presses and Pulses of Elevated Salinity. *Estuaries and Coasts*. 2018:1-11.
- 643 12. Creighton C, Hobday AJ, Lockwood M, Pecl GT. Adapting management of marine  
644 environments to a changing climate: a checklist to guide reform and assess progress.  
645 *Ecosystems*. 2016;19(2):187-219.
- 646 13. Weinstein MP, Litvin SY. Macro-Restoration of Tidal Wetlands: A Whole Estuary  
647 Approach. *Ecological Restoration*. 2016;34(1):27-38.
- 648 14. Crooks S, D. Herr, J. Tamelander, D. Laffoley, and J. Vandever. "Mitigating Climate  
649 Change through Restoration and Management of Coastal Wetlands and Near-shore Marine  
650 Ecosystems: Challenges and Opportunities." Environment department papers;no. 121.  
651 Washington, DC.: World Bank; 2011.
- 652 15. Authority GBRMP. Great Barrier Reef Region Strategic Assessment: Strategic  
653 assessment report. Report ER. Townsville: Great Barrier Reef Marine Park Authority; 2014  
654 2014.
- 655 16. Arthington AH, Godfrey PC, Pearson RG, Karim F, Wallace J. Biodiversity values of  
656 remnant freshwater floodplain lagoons in agricultural catchments: evidence for fish of the  
657 Wet Tropics bioregion, northern Australia. *Aquatic Conservation: Marine and Freshwater*  
658 *Ecosystems*. 2015;25:336-52.
- 659 17. McCook LJ, Ayling T, Cappo M, Choat JH, Evans RD, De Freitas DM, et al. Adaptive  
660 management of the Great Barrier Reef: a globally significant demonstration of the benefits of  
661 networks of marine reserves. *Proc Natl Acad Sci U S A*. 2010;107(43):18278-85.

- 662 18. Pearson RG, Godfrey PC, Arthington AH, Wallace J, Karim F, Ellison M. Biophysical  
663 status of remnant freshwater floodplain lagoons in the Great Barrier Reef catchment: a  
664 challenge for assessment and monitoring. *Marine and Freshwater Research*. 2013;64(3):208-  
665 22.
- 666 19. Mitsch WJ, Gosselink JG. *Wetland Ecosystems*. New Jersey, USA.: John Wiley & Sons,  
667 Inc; 2007. 582 p.
- 668 20. Houston WA, Duivenvoorden LJ. Replacement of littoral native vegetation with the  
669 ponded pasture grass *Hymenachne amplexicaulis*: effects on plant, macroinvertebrate and  
670 fish biodiversity of backwaters in the Fitzroy River, Central Queensland, Australia. *Marine and*  
671 *Freshwater Research*. 2002;53:1235-44.
- 672 21. Grice AC, Cassady J, Nicholas DM. Indigenous and non-Indigenous knowledge and  
673 values combine to support management of Nywaigi lands in the Queensland coastal tropics.  
674 *Ecological Management & Restoration*. 2012;13:93-7.
- 675 22. Dobbs RJ, Davies CL, Walker ML, Pettit NE, Pusey BJ, Close PG, et al. Collaborative  
676 research partnerships inform monitoring and management of aquatic ecosystems by  
677 Indigenous rangers. *Rev Fish Biol Fisher*. 2016;26(4):711-25.
- 678 23. Sheaves M, Brookes J, Coles R, Freckelton M, Groves P, Johnston R, et al. Repair and  
679 revitalisation of Australia' s tropical estuaries and coastal wetlands: Opportunities and  
680 constraints for the reinstatement of lost function and productivity. *Marine Policy*. 2014;47:23-  
681 38.
- 682 24. Stumpf R, Haines JW. Variations in tidal level in the Gulf of Mexico and implications  
683 for tidal wetlands. *Estuarine, Coastal and Shelf Science*. 1998;46:165-73.
- 684 25. Great Barrier Reef Marine Park Authority. Great Barrier Reef Region Strategic  
685 Assessment: Strategic assessment report. Townsville: GBRMPA; 2014.
- 686 26. Sheaves M, Brookes J, Coles R, Freckelton M, Groves P, Johnston R, et al. Repair and  
687 revitalisation of Australia's tropical estuaries and coastal wetlands: Opportunities and  
688 constraints for the reinstatement of lost function and productivity. *Marine Policy*. 2014;47:23-  
689 38.
- 690 27. Howe AJ, Rodríguez JF, Spencer J, MacFarlane GR, Saintilan N. Response of estuarine  
691 wetlands to reinstatement of tidal flows. *Marine and Freshwater Research*. 2010;61(6):702-  
692 13.
- 693 28. GBRMPA. Coastal ecosystems management - case study: water quality management.  
694 Townsville: Australian Government; 2013.
- 695 29. Waltham NJ, Burrows D, Wegscheidl C, Buelow C, Ronan M, Connolly N, et al. Lost  
696 Floodplain Wetland Environments and Efforts to Restore Connectivity, Habitat, and Water  
697 Quality Settings on the Great Barrier Reef. *Frontiers in Marine Science*. 2019;6(71).
- 698 30. Arthington AH, Godfrey PC, Pearson RG, Karim F, Wallace J. Biodiversity values of  
699 remnant freshwater floodplain lagoons in agricultural catchments: evidence for fish of the  
700 Wet Tropics bioregion, northern Australia. *Aquatic Conservation: Marine and Freshwater*  
701 *Ecosystems*. 2015;25(3):336-52.
- 702 31. Pearson R, Godfrey P, Arthington A, Wallace J, Karim F, Ellison M. Biophysical status  
703 of remnant freshwater floodplain lagoons in the Great Barrier Reef catchment: a challenge  
704 for assessment and monitoring. *Marine and Freshwater Research*. 2013;64(3):208-22.
- 705 32. Butler B, Dominica L, Damien B, Glenn M. AQUATIC ECOLOGY ASSESSMENT OF  
706 MUNGALLA WETLANDS. ACTFR Report. Townsville: Australian Centre for Tropical Freshwater  
707 Research; 2009 2009. Report No.: 09/38.

- 708 33. Veitch V, Sawynok B, Authority GBRMP, Queensland S. Freshwater wetlands and fish:  
709 importance of freshwater wetlands to marine fisheries resources in the Great Barrier Reef.  
710 Townsville, Qld.: The Authority; 2005 2005.
- 711 34. Flint N, Crossland M, Pearson R. Sublethal effects of fluctuating hypoxia on juvenile  
712 tropical Australian freshwater fish. *Marine and Freshwater Research*. 2015;66(4):293.
- 713 35. Perna CN, Cappo M, Pusey BJ, Burrows DW, Pearson RG. Removal of Aquatic Weeds  
714 Greatly Enhances Fish Community Richness and Diversity: An Example from the Burdekin  
715 River Floodplain, Tropical Australia. *River Research and Applications*. 2012;28:1093-104.
- 716 36. Staines S. History of the first occupation of Mungalla by the Atkinson Family -  
717 Transcription from original letter by Richard Wallace. Townsville; 1990.
- 718 37. Middleton CH, editor History of para grass in Queensland. Probing ponded pastures  
719 workshop; 1991 1991: Queensland Department of Primary Industries and Department of  
720 Environment and Heritage.
- 721 38. Wildin JH, editor Ponded pasture systems. Probing Ponded Pastures Workshop;  
722 1991 July 16-18 1991. Rockhamton: University of Central Queensland.
- 723 39. Register of Australian Herbage Plant Cultivars. A: Grasses, 24. *Hymenachne* and 25.  
724 *Aleman*. *Australian Journal of Experimental Agriculture*. 1989;29:293-4.
- 725 40. Csurhes S, Edwards R. Potential Environmental Weeds in Australia: Candidate Species  
726 for Preventative Control. Canberra: Department of Environment and Heritage; 1998 1998.
- 727 41. Csurhes SM, Macka AP, Fitzsimmons L. *Hymenachne* (*Hymenachne amplexicaulis*) in  
728 Queensland. Brisbane, Australia: Department of Natural Resources; 1999 1999.
- 729 42. Wearne LJ, Clarkson J, Grice AC, van Klinken RD, Vitelli JS. The biology of Australian  
730 weeds 56. *Hymenachne amplexicaulis* (Rudge) Nees. *Plant Protection Quarterly*. 2010;25:146-  
731 61.
- 732 43. Grice AC. A STRATEGY FOR THE MANAGEMENT OF THE MUNGALLA WETLANDS.  
733 Strategy. Townsville, QLD, Australia: CSIRO; 2008 November 2008.
- 734 44. Karim F, Nicholas M, Grice T, Marvanek S, Wallace J. Hydrodynamic modelling of  
735 seawater intrusion in a riverine wetland in north Queensland, Australia. *Hydrology and Water*  
736 *Resources Symposium 2014*. 2014:645.
- 737 45. Blackman JG, Perry TW, Ford GI, Craven SA, Gardener SJ, De Lai RJ. Characteristics of  
738 important wetlands in Queensland / J.G. Blackman ... [et al.]. Brisbane: Queensland  
739 Government, Environmental Protection Agency; 1999 1999.
- 740 46. Knight J, Corcoran J, Rampi L, Pelletier K. Theory and Applications of Object-Based  
741 Image Analysis and Emerging Methods in Wetland Mapping. 2015. p. 574 pp.
- 742 47. Karim F, Nicholas M, Grice T, Marvanek S, Wallace J, editors. Hydrodynamic modelling  
743 of seawater intrusion in a riverine wetland in north Queensland, Australia. *Hydrology and*  
744 *Water Resources Symposium 2014*; 2014: Engineers Australia.
- 745 48. Butler B, Dominica L, Damien B, Glenn M. Aquatic ecology assessment of the Mungalla  
746 wetlands: May to August 2009. ACTFR Report. Townsville: Australian Centre for Tropical  
747 Freshwater Research; 2009 2009. Report No.: 09/38.
- 748 49. Waltham N, Davis A. Fish survey Lilliesmere creek: Pre-fish barrier construction. 2016  
749 2016.
- 750 50. Pusey B, Kennard M, Arthington A. *Freshwater Fishes of North-Eastern Australia* 2004  
751 2004-09-09.
- 752 51. Perna C, Burrows D. Improved dissolved oxygen status following removal of exotic  
753 weed mats in important fish habitat lagoons of the tropical Burdekin River floodplain,  
754 Australia. *Marine Pollution Bulletin*. 2005;51:138-48.

- 755 52. Butler B, Burrows DW. Dissolved oxygen guidelines for freshwater habitats of northern  
756 Australia. 2007 2007.
- 757 53. Grice T, Nicholas M, Williams P, Collins E. Using fire to manage para grass in wetlands:  
758 a Queensland case study. Symposium 3: Fire management; 23-24 April; Kakadu National Park,  
759 Northern Territory: Department of the Environment, Water, Heritage and the Arts; 2008.
- 760 54. Whitehead PJ. Dynamics of habitat use by the magpie goose (*Anseranas*  
761 *semipalmata*): implications for conservation management. In: University CD, editor. PhD  
762 Dissertation ed. Darwin 1998.
- 763 55. Traill LW, Brook BW. An aggregative response of the tropical Australian magpie goose  
764 (*Anseranas semipalmata*) to seasonal floodplains. *Journal of Tropical Ecology*.  
765 2011;27(2):171-80.
- 766 56. Owens CS, Smart M, Honnell DR, Dick GO. Effects of pH on growth of *Salvinia molesta*  
767 Mitchell. *J Aquat Plant Manage*. 2005;43:34-8.
- 768 57. Harding D. Limnological Trends in Lake Kariba. *Nature*. 1961;191(4784):119-21.
- 769 58. Julien M, Center T, Tipping P. Floating fern (*salvinia*). Biological control of invasive  
770 plants in the eastern United States' (Eds RV Driesche, B Blossey, M Hoddle, S Lyon, R Reardon)  
771 pp. 2002:17-32.
- 772 59. Flores D, Carlson J. Biological control of giant salvinia in East Texas waterways and the  
773 impact on dissolved oxygen levels. *J Aquat Plant Manag*. 2006;44:115-21.
- 774 60. Upadhyay R, Panda S. Salt tolerance of two aquatic macrophytes, *Pistia stratiotes* and  
775 *Salvinia molesta*. *Biologia plantarum*. 2005;49(1):157-9.
- 776 61. Reid B, Grice T, Holtum J, Nicholas M, Wallace J, Waltham N. Assessing the potential  
777 for controlling four invasive species (aleman grass, water hyacinth, olive hymenachne and  
778 para grass) using seawater in northern Australian coastal wetlands 2018.
- 779 62. Wallace J, Waltham N, Burrows D. A comparison of temperature regimes in dry-season  
780 waterholes in the Flinders and Gilbert catchments in northern Australia. *Marine and*  
781 *Freshwater Research*. 2017;68(4):650-67.
- 782 63. P. Rozas L, J. Reed D. Comparing nekton assemblages of subtidal habitats in pipeline  
783 canals traversing brackish and saline marshes in coastal Louisiana 1994. 262-75 p.
- 784 64. Portnoy JW. Salt Marsh Diking and Restoration: Biogeochemical Implications of  
785 Altered Wetland Hydrology. *Environ Manage*. 1999;24(1):111-20.
- 786 65. Smith SM, Roman CT, James-Pirri M-J, Chapman K, Portnoy J, Gwilliam E. Responses  
787 of Plant Communities to Incremental Hydrologic Restoration of a Tide-Restricted Salt Marsh  
788 in Southern New England (Massachusetts, U.S.A.). *Restoration Ecology*. 2009;17(5):606-18.
- 789 66. Boon PI, Cook P, Woodland R. The Gippsland Lakes: management challenges posed by  
790 long-term environmental change. *Marine and Freshwater Research*. 2016;67(6):721-37.
- 791 67. Winn K, Saynor M, Eliot M, Elio I. Saltwater intrusion and morphological change at the  
792 mouth of the East Alligator River, Northern Territory. *Journal of Coastal research*. 2006:137-  
793 49.
- 794 68. Herbert ER, Boon P, Burgin AJ, Neubauer SC, Franklin RB, Ardón M, et al. A global  
795 perspective on wetland salinization: ecological consequences of a growing threat to  
796 freshwater wetlands. *Ecosphere*. 2015;6(10):1-43.
- 797 69. Reid B, Grice T, Holtum J, Nicholas M, Wallace J, Waltham N. Assessing the potential  
798 for controlling four invasive aquatic plant species (aleman grass, water hyacinth, olive  
799 hymenachne and para grass) using seawater in northern Australian coastal wetlands.  
800 Townsville: James Cook University; 2018.
- 801 70. Mitsch WJ, Gosselink JG. *Wetlands*. 2nd ed. New York: Van Nostrand Reinhold; 1993.



- 802 71. Butler B, Loong D, Burrows D, Morgan G. Aquatic ecology assessment of Mungalla  
803 wetlands. James Cook University: TropWATER; 2009.
- 804 72. Burrows D, Butler B. Primary studies of temperature regimes and temperature  
805 tolerance of aquatic fauna in freshwater habitats of northern Australia. Australian Centre of  
806 Tropical Freshwater Research (12/01): James Cook University, Townsville; 2012. Contract  
807 No.: 12/01.
- 808 73. Waltham NJ. Acute thermal effects in an inland freshwater crab *Austrothelphusa*  
809 *transversa* (von Martens, 1868) occupying seasonal, tropical rivers. *Journal of Crustacean*  
810 *Biology*. 2018;38(4):497-503.
- 811 74. Stewart BA, Close PG, Cook PA, Davies PM. Upper thermal tolerances of key taxonomic  
812 groups of stream invertebrates. *Hydrobiologia*. 2013;718(1):131-40.
- 813 75. R. AJSaL. Extreme pH value, In *Water Quality Criteria for Freshwater Fish*. 2nd Edition  
814 ed. London, UK.: Butterworth-Heinemann; 1982.
- 815 76. Australian and New Zealand Environment and Conservation Council AaRCoAaNZ.  
816 Australian and New Zealand guidelines for freshand marine water quality. Volume 2,  
817 Aquaticecosystems. Australia: Environment Australia; 2000.
- 818 77. Cook FJ, Hicks W, Gardner EA, Carlin GD, Froggatt DW. Export of Acidity in Drainage  
819 Water from Acid Sulphate Soils. *Marine Pollution Bulletin*. 2000;41(7):319-26.
- 820 78. Veitch V, Burrows D, Hudson D, Butler B. Removal of Aquatic Weeds From Lagoon  
821 Creek, Herbert Catchment North Queensland: Trialling Novel Removal Methods and  
822 Demonstration of Environmental Benefits. Townsville, Australia: Australian Centre for  
823 Tropical Freshwater Research; 2007. Report No.: 07/15.
- 824 79. Lemcke B. Aleman Grass - A high value grazing species grown in flooded or ponded  
825 areas. Northern Territory, Australia; 2019.
- 826 80. Veitch V, Tait J, Burrows DW. Fish passage connectivity issues lower Sheep Station  
827 Creek: dry and wet season investigations of water quality and fish assemblages. James Cook  
828 University, Townsville: Australian Centre for Tropical Freshwater Research (08/02); 2008.  
829 Contract No.: 08/02.
- 830 81. Great Barrier Reef Marine Park Authority. Informing the outlook for Great Barrier Reef  
831 coastal ecosystems. Townsville, Australia.: Great Barrier Reef Marine Park Authority; 2012.
- 832 82. Bell-James J, Lovelock CE. Tidal boundaries and climate change mitigation—the curious  
833 case of ponded pastures. *Australian Property Law Journal*. 2019;27(2):114-33.
- 834 83. Great Barrier Reef Marine Park Authority. Reef 2050 Long-Term Sustainability Plan.  
835 Australia: Commonwealth of Australia; 2018.
- 836

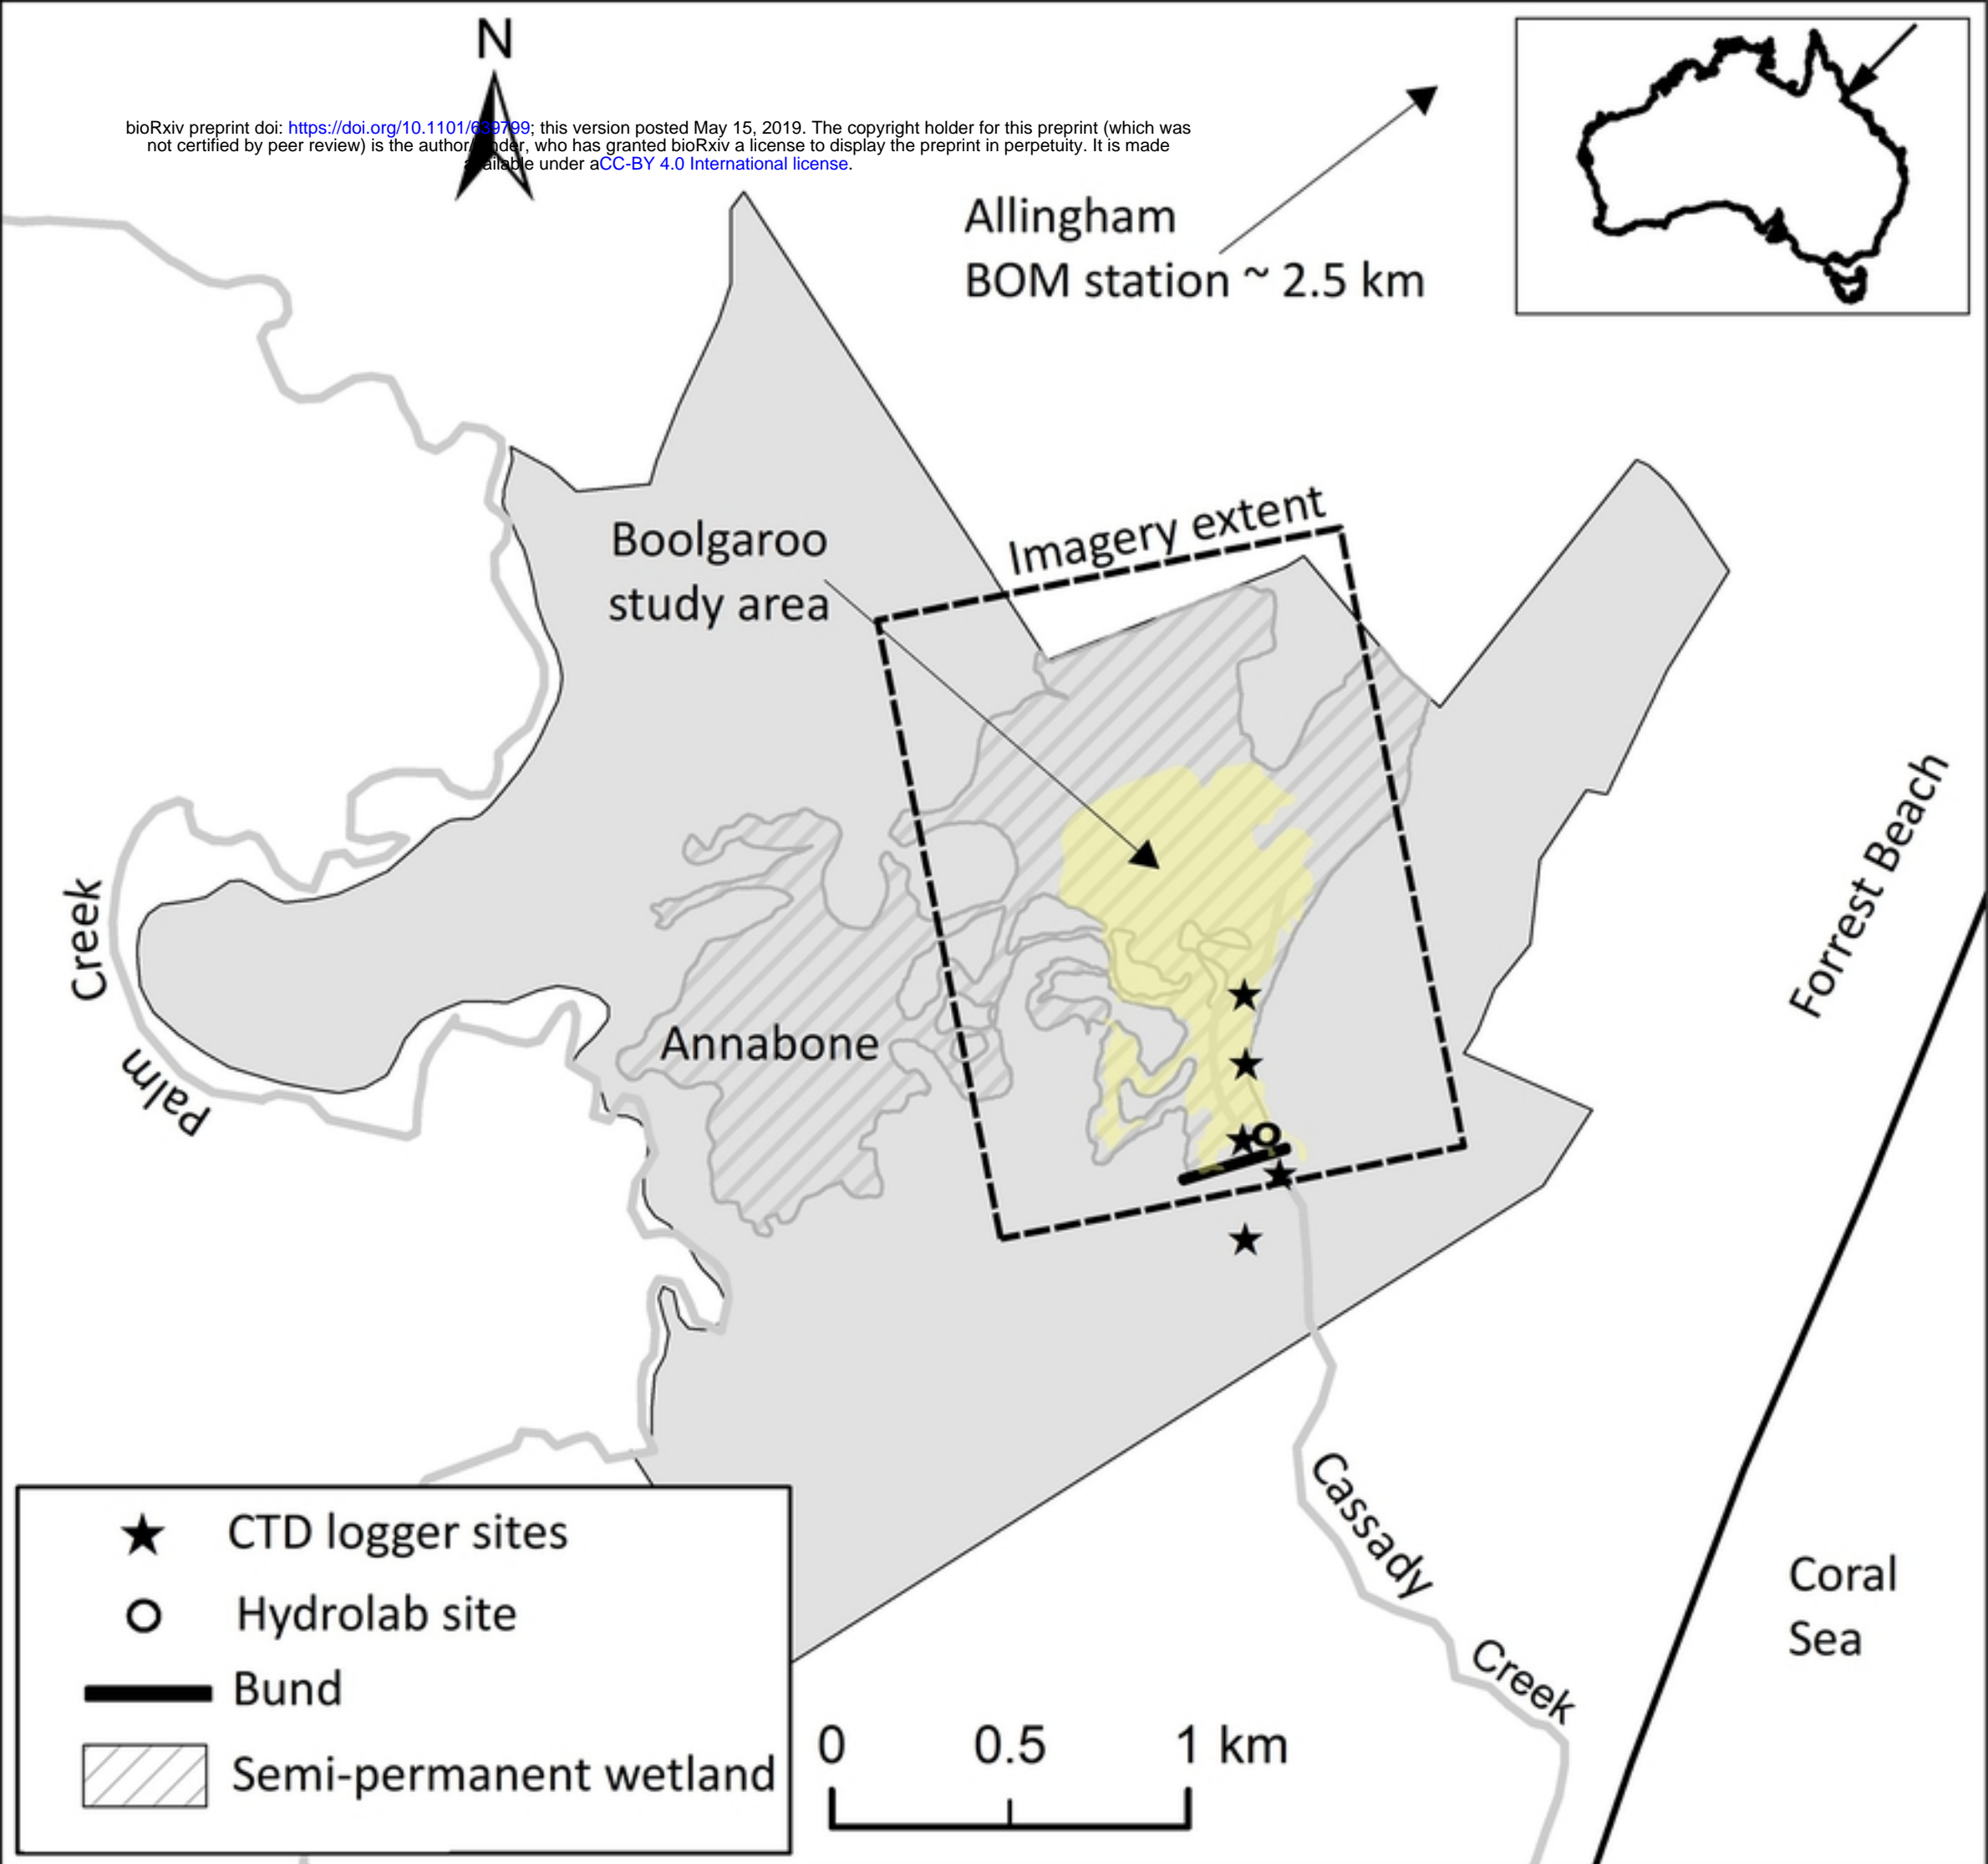

Figure

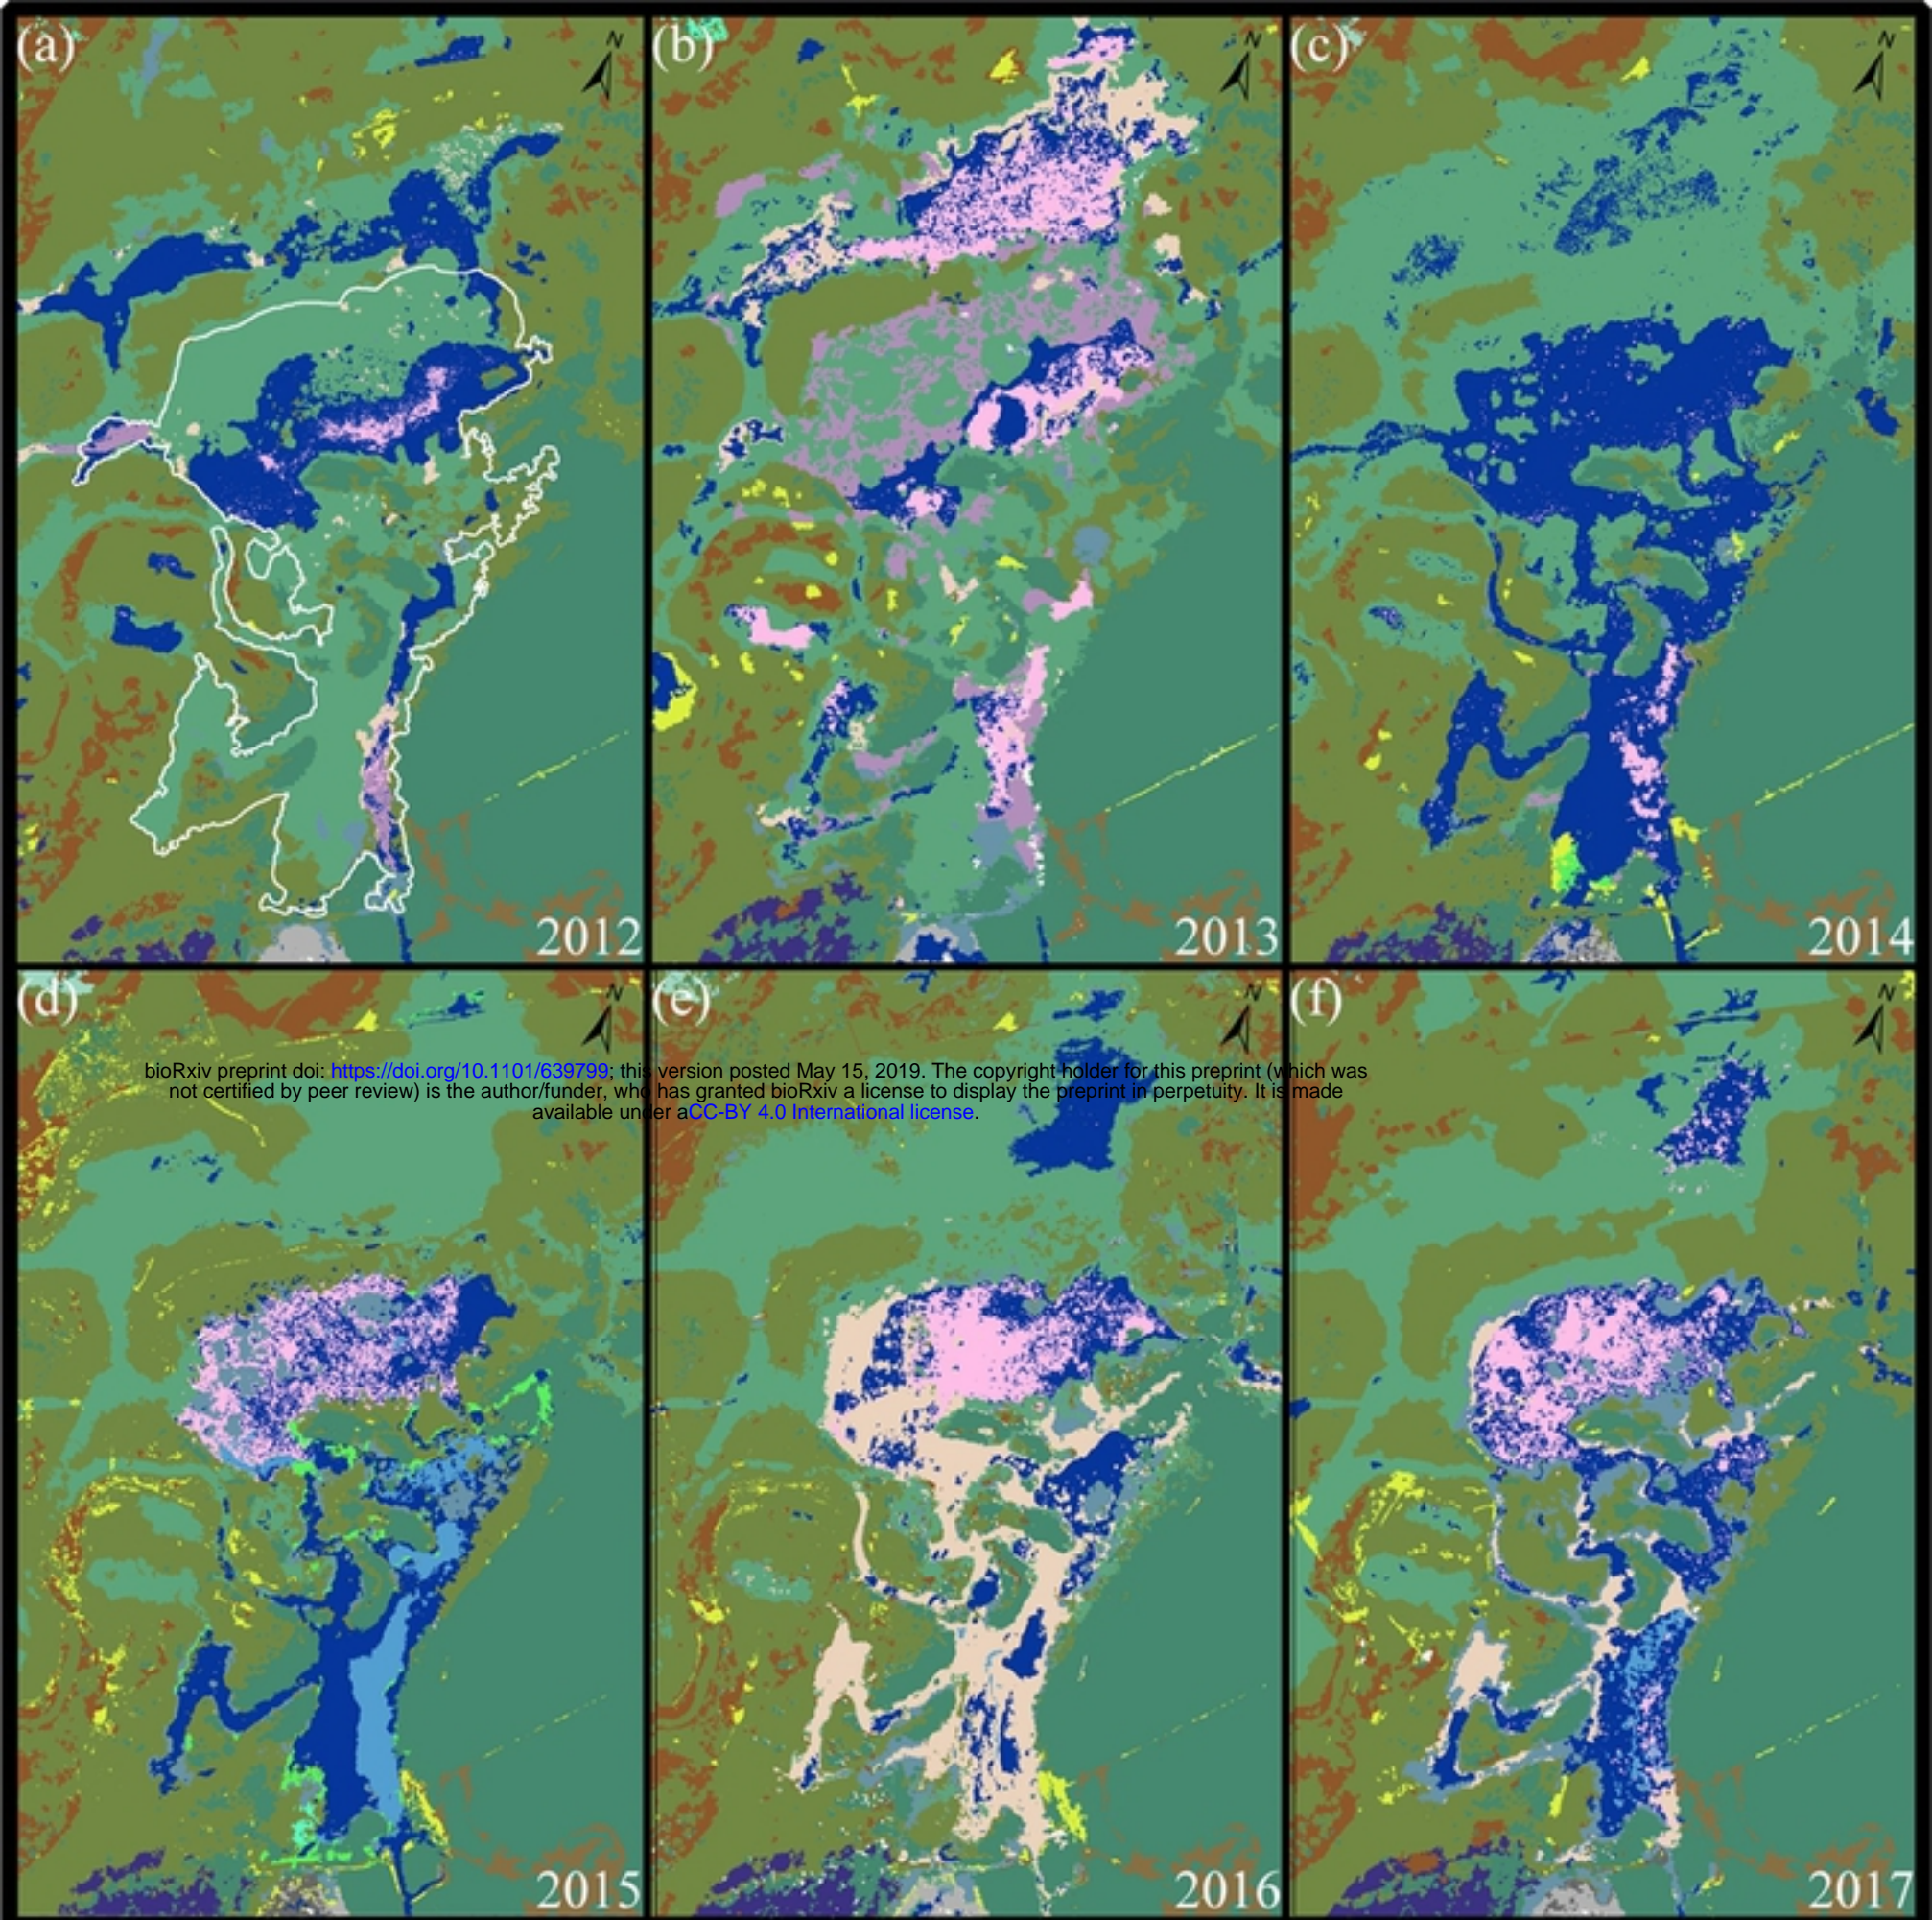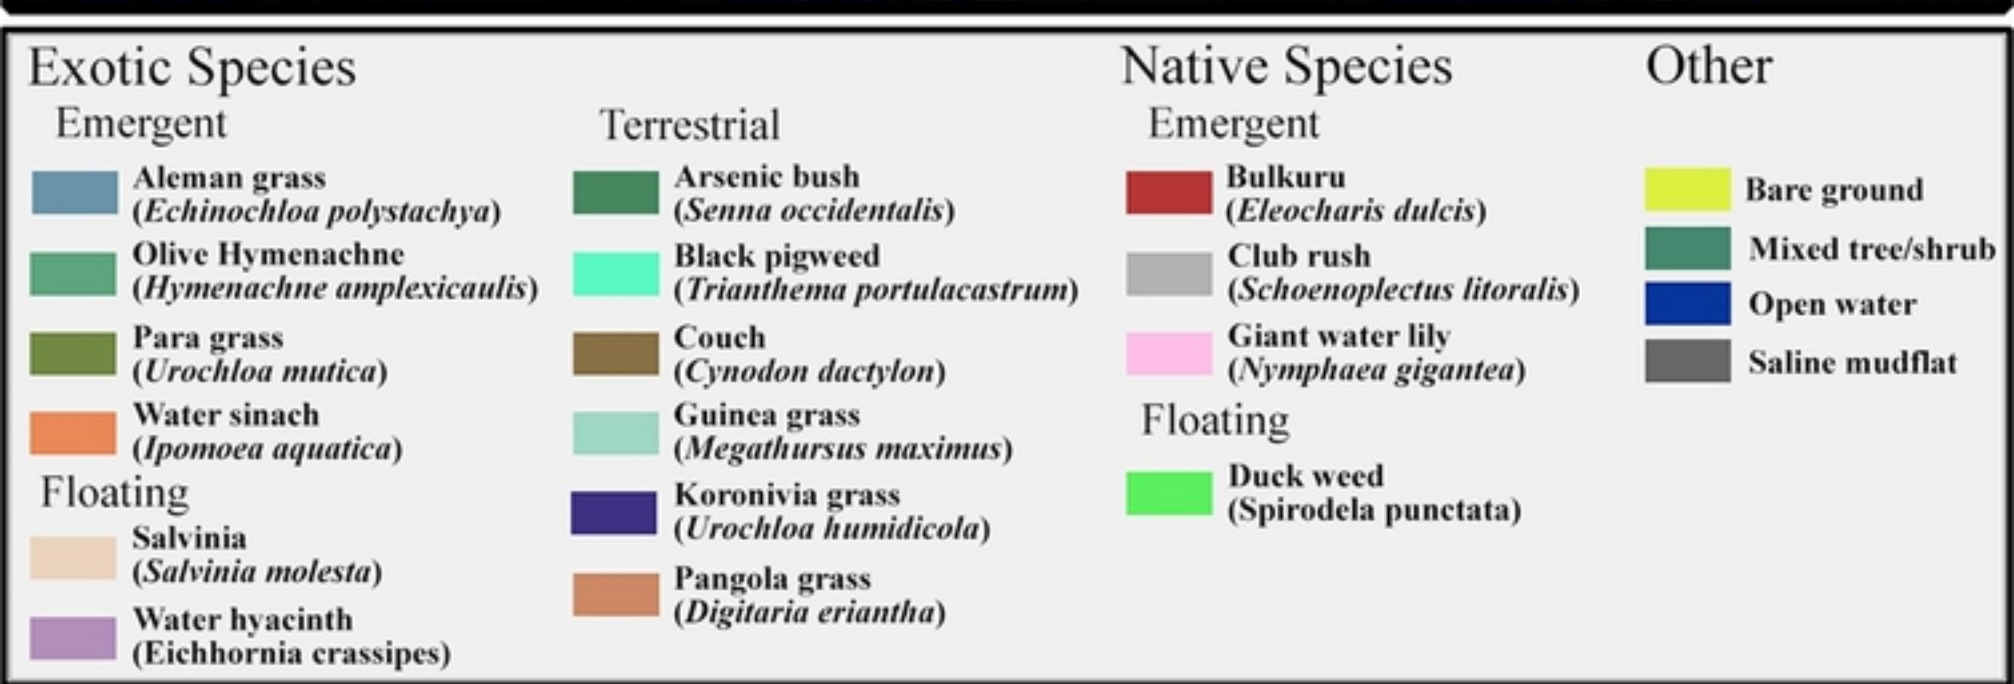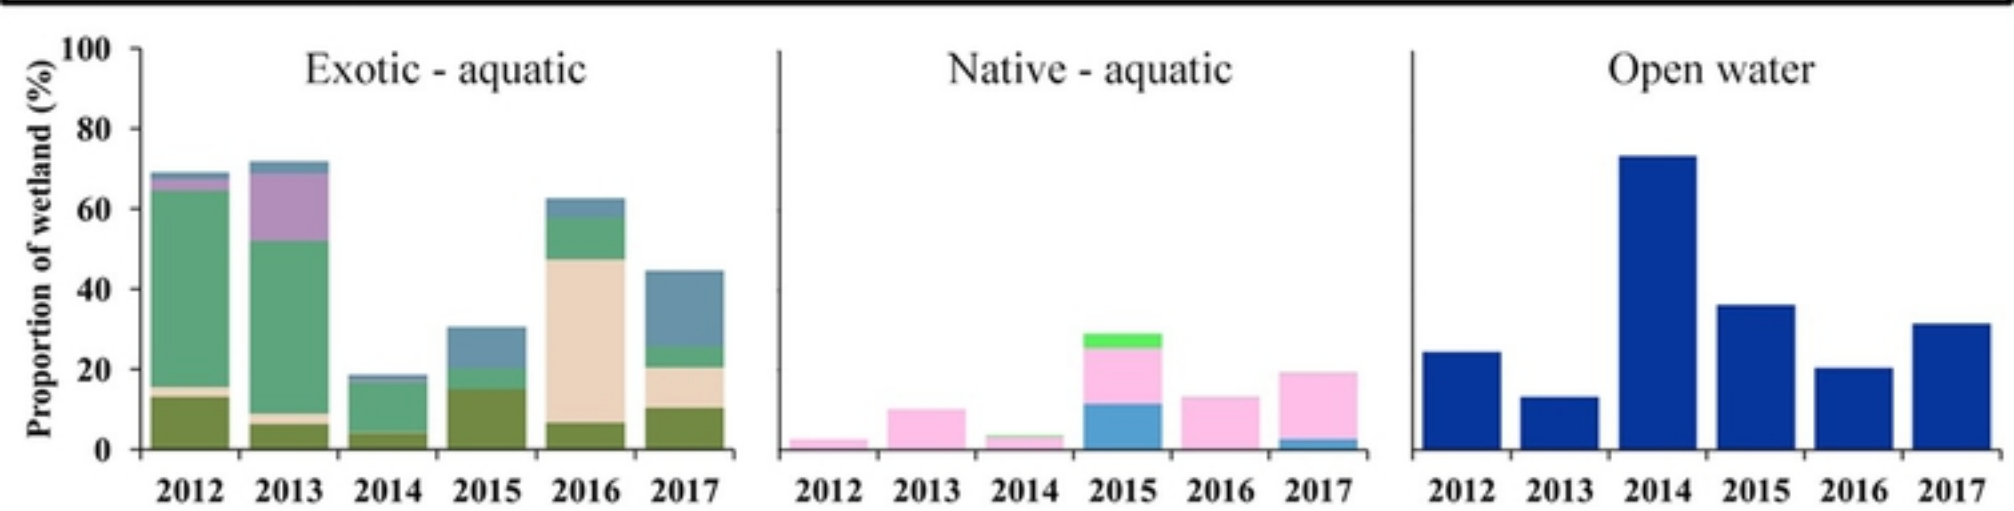

Figure

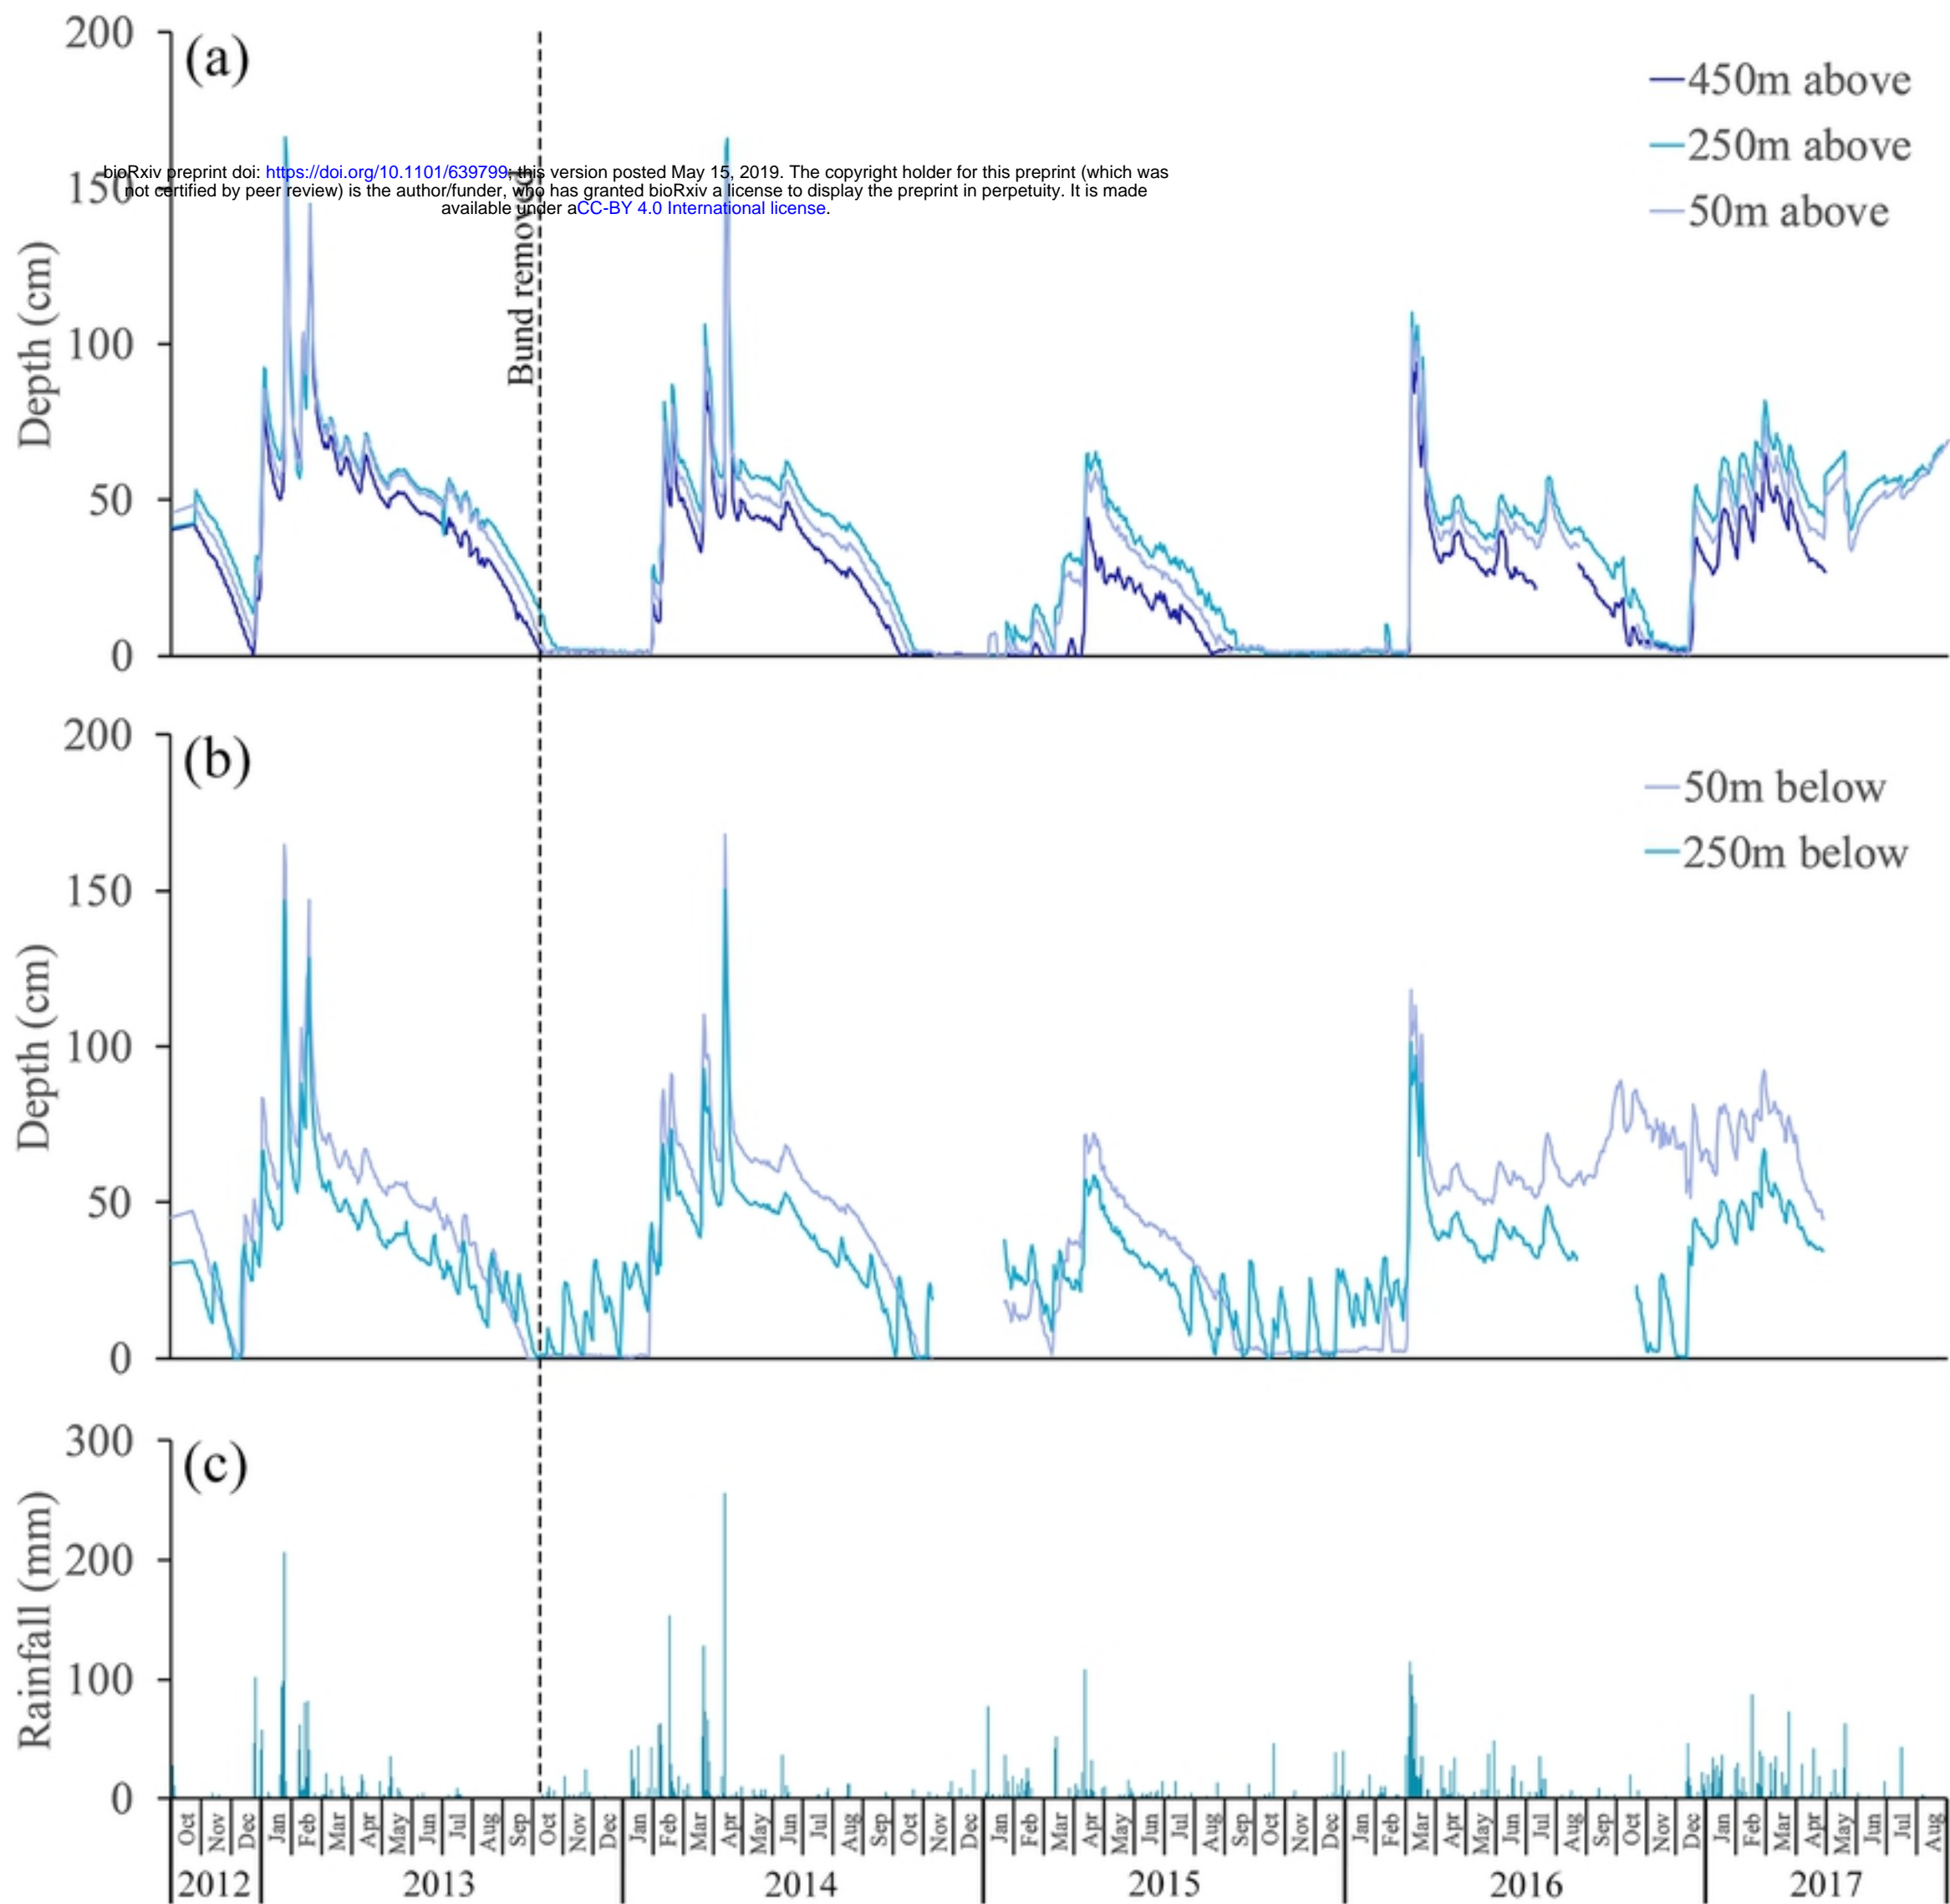

Figure

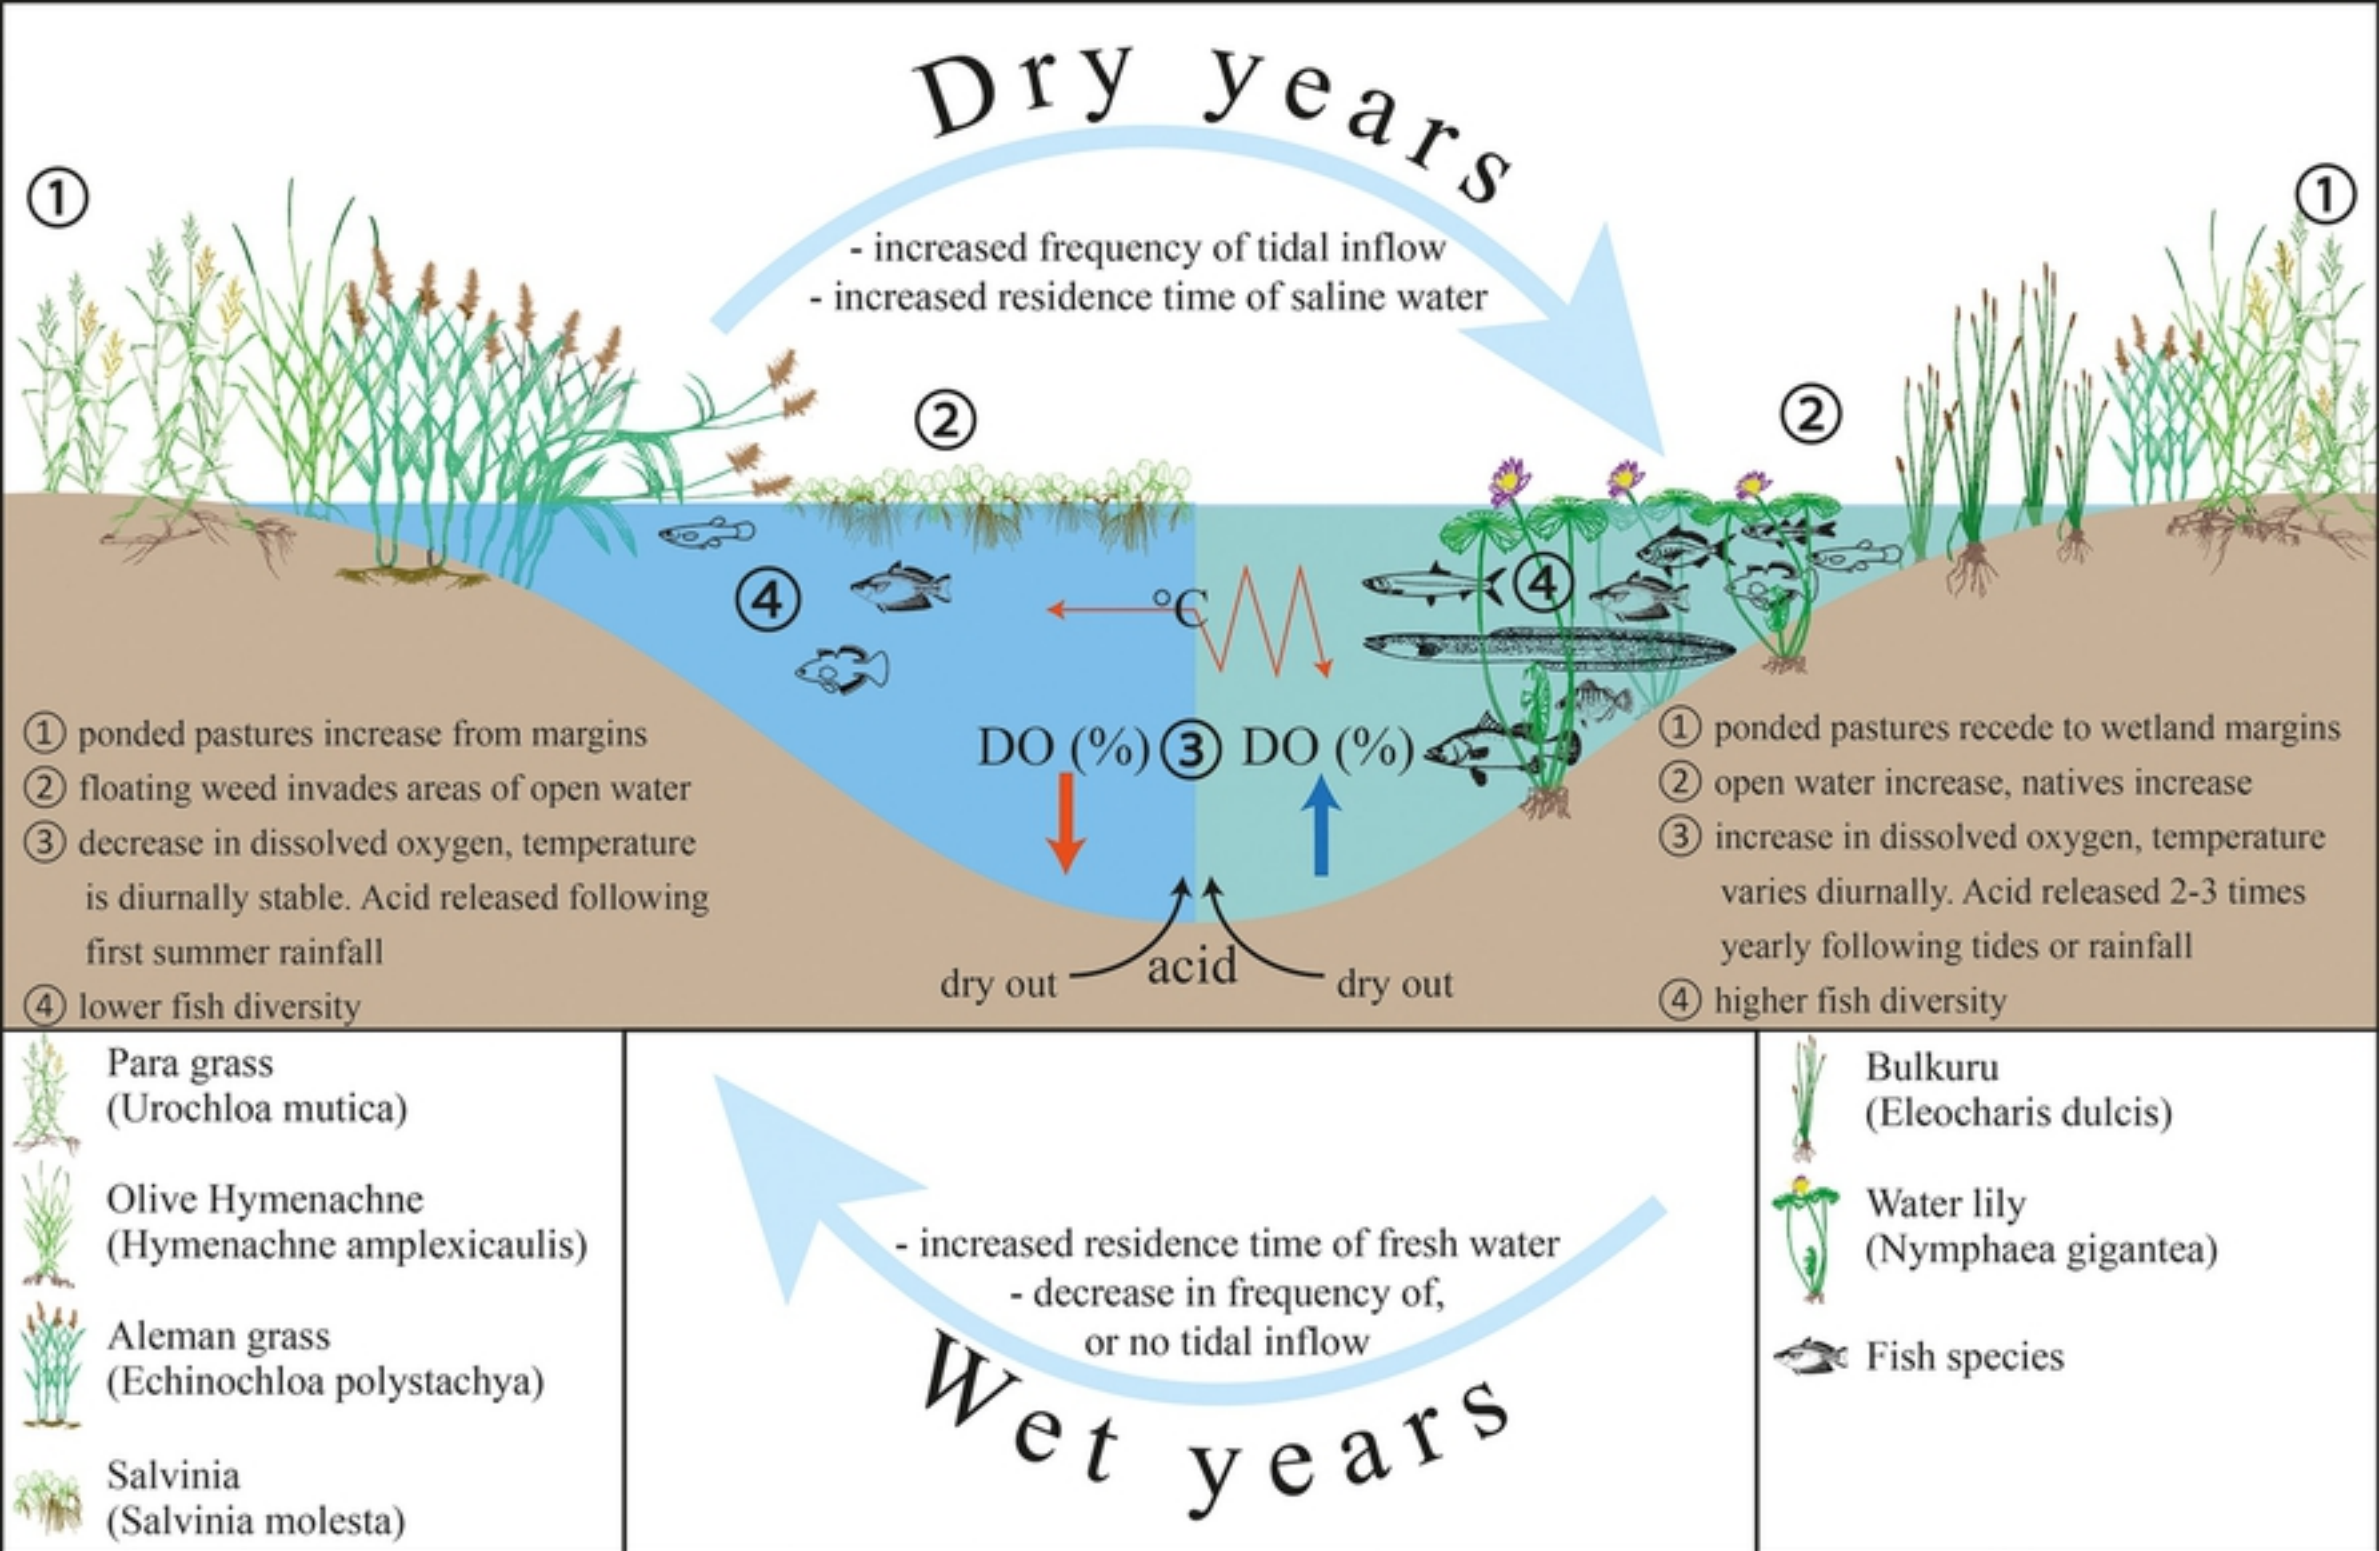

Figure

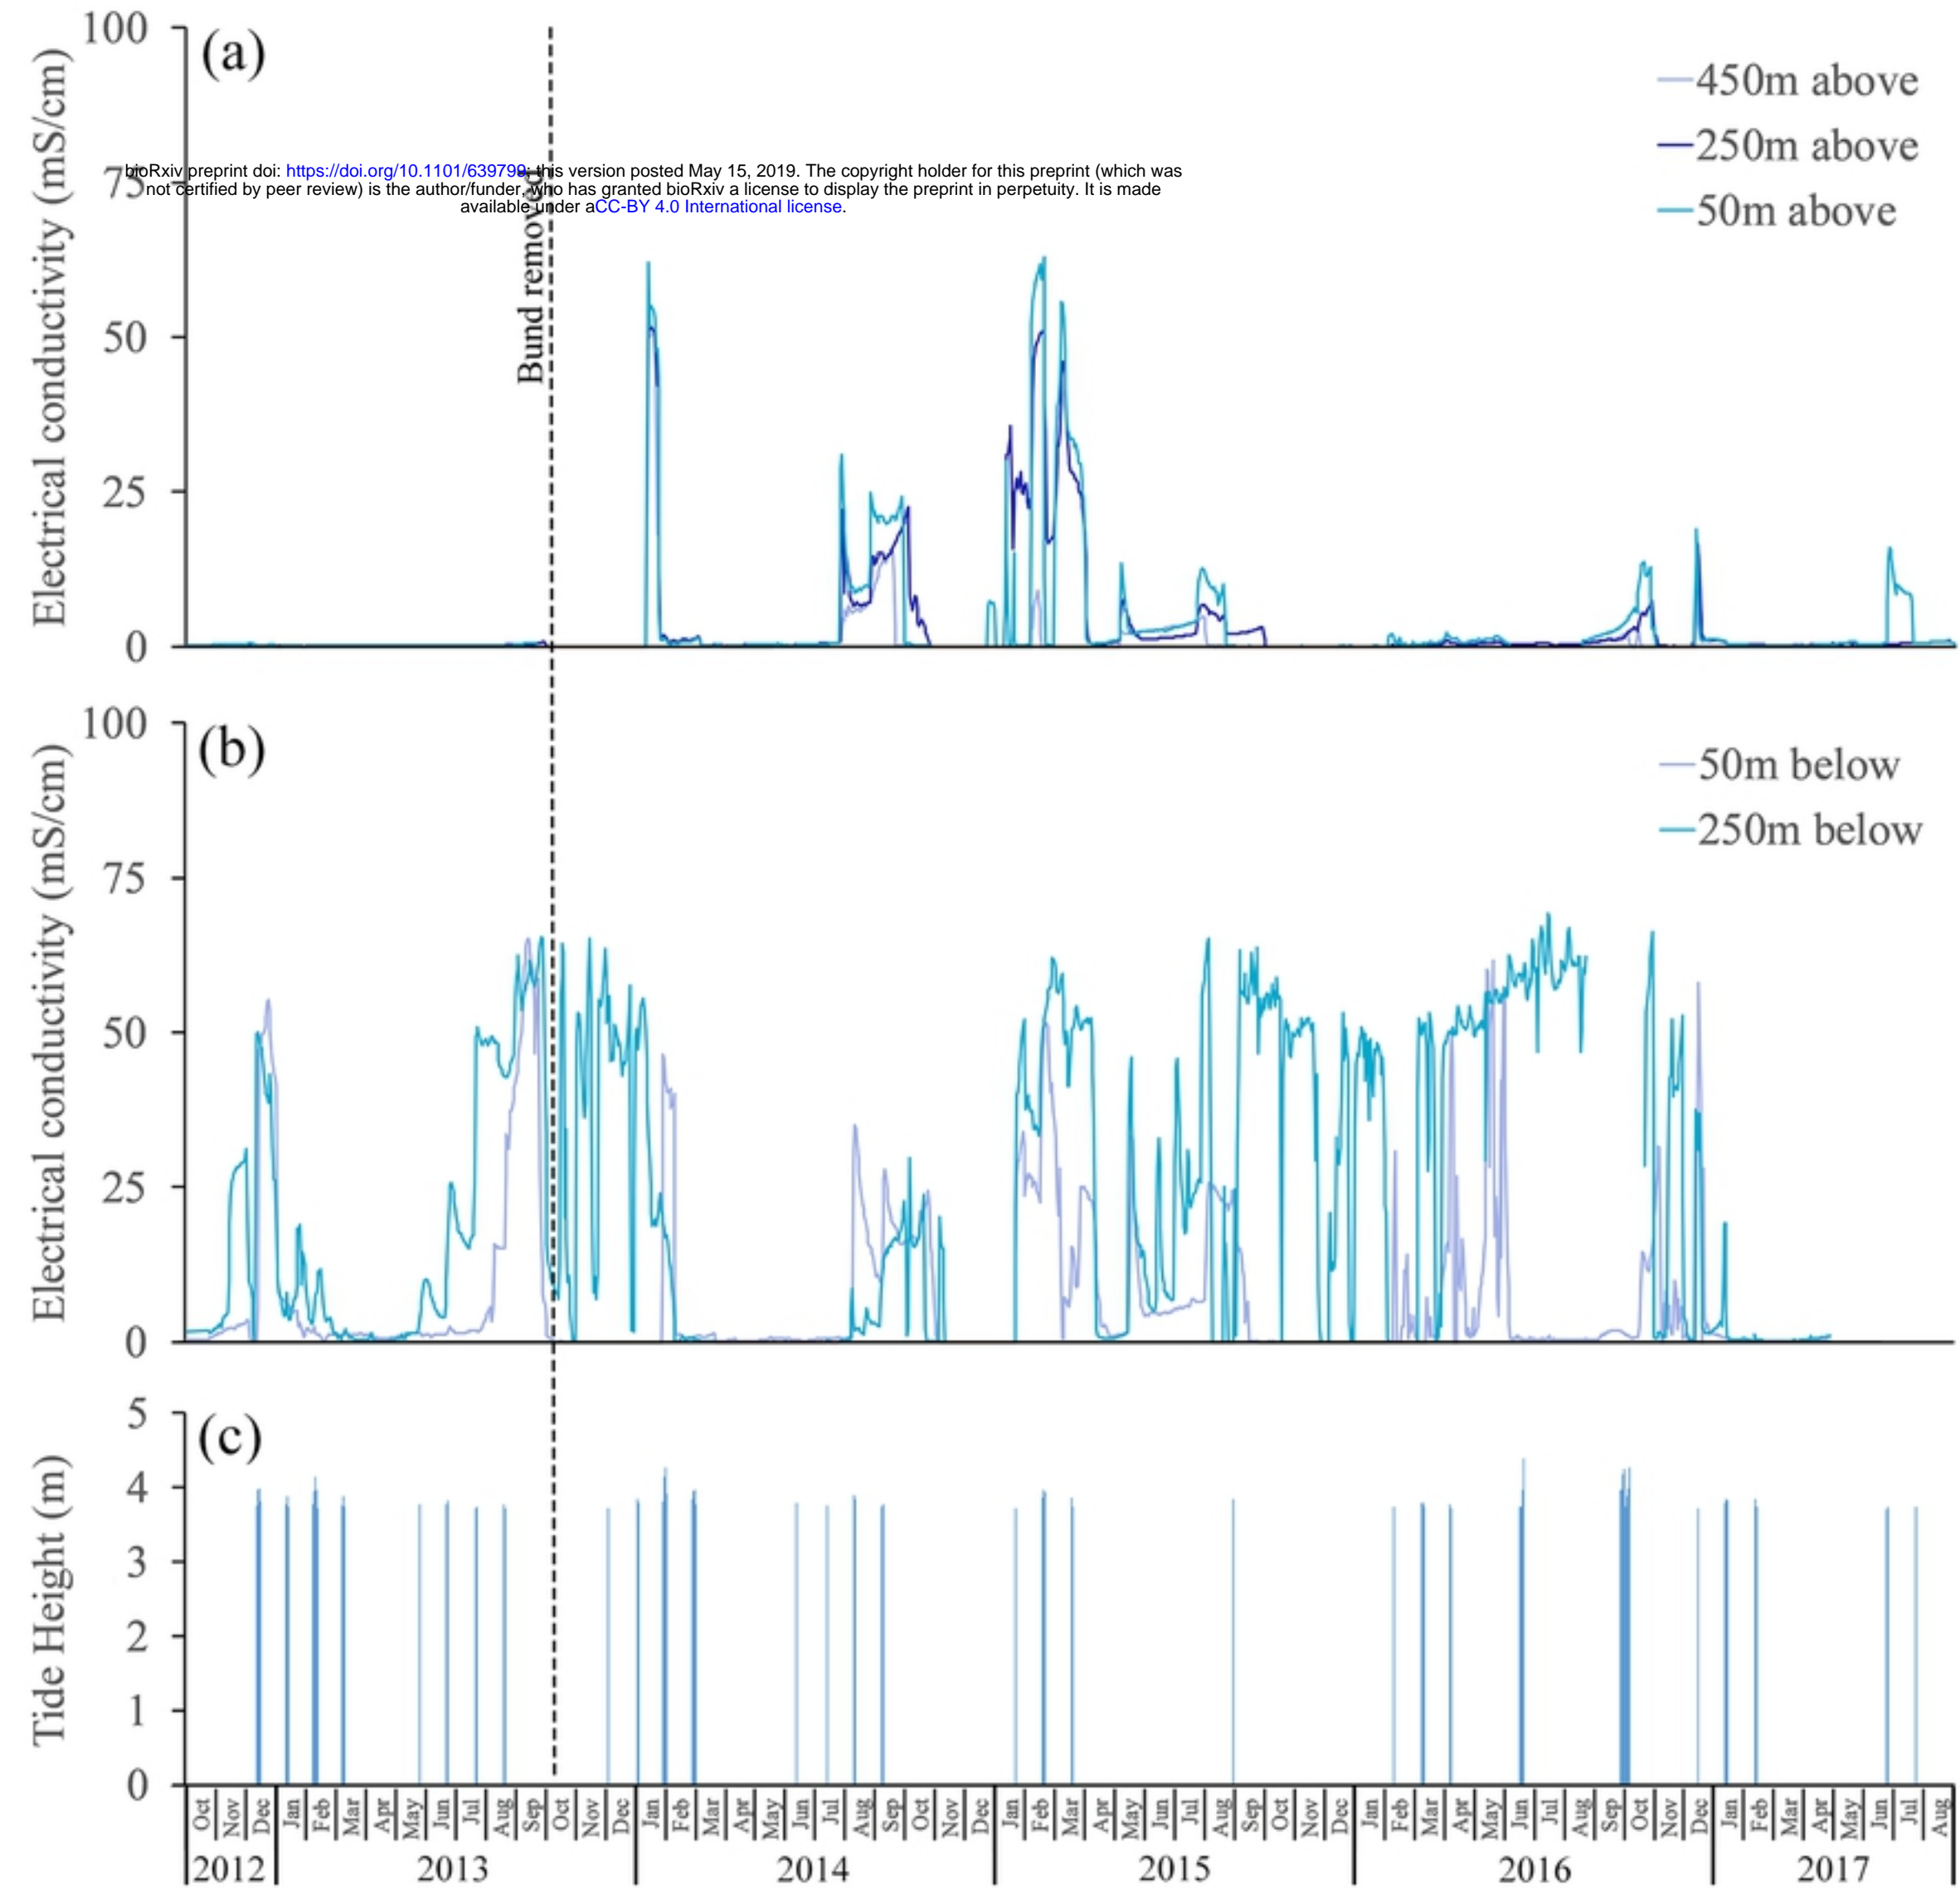

Figure

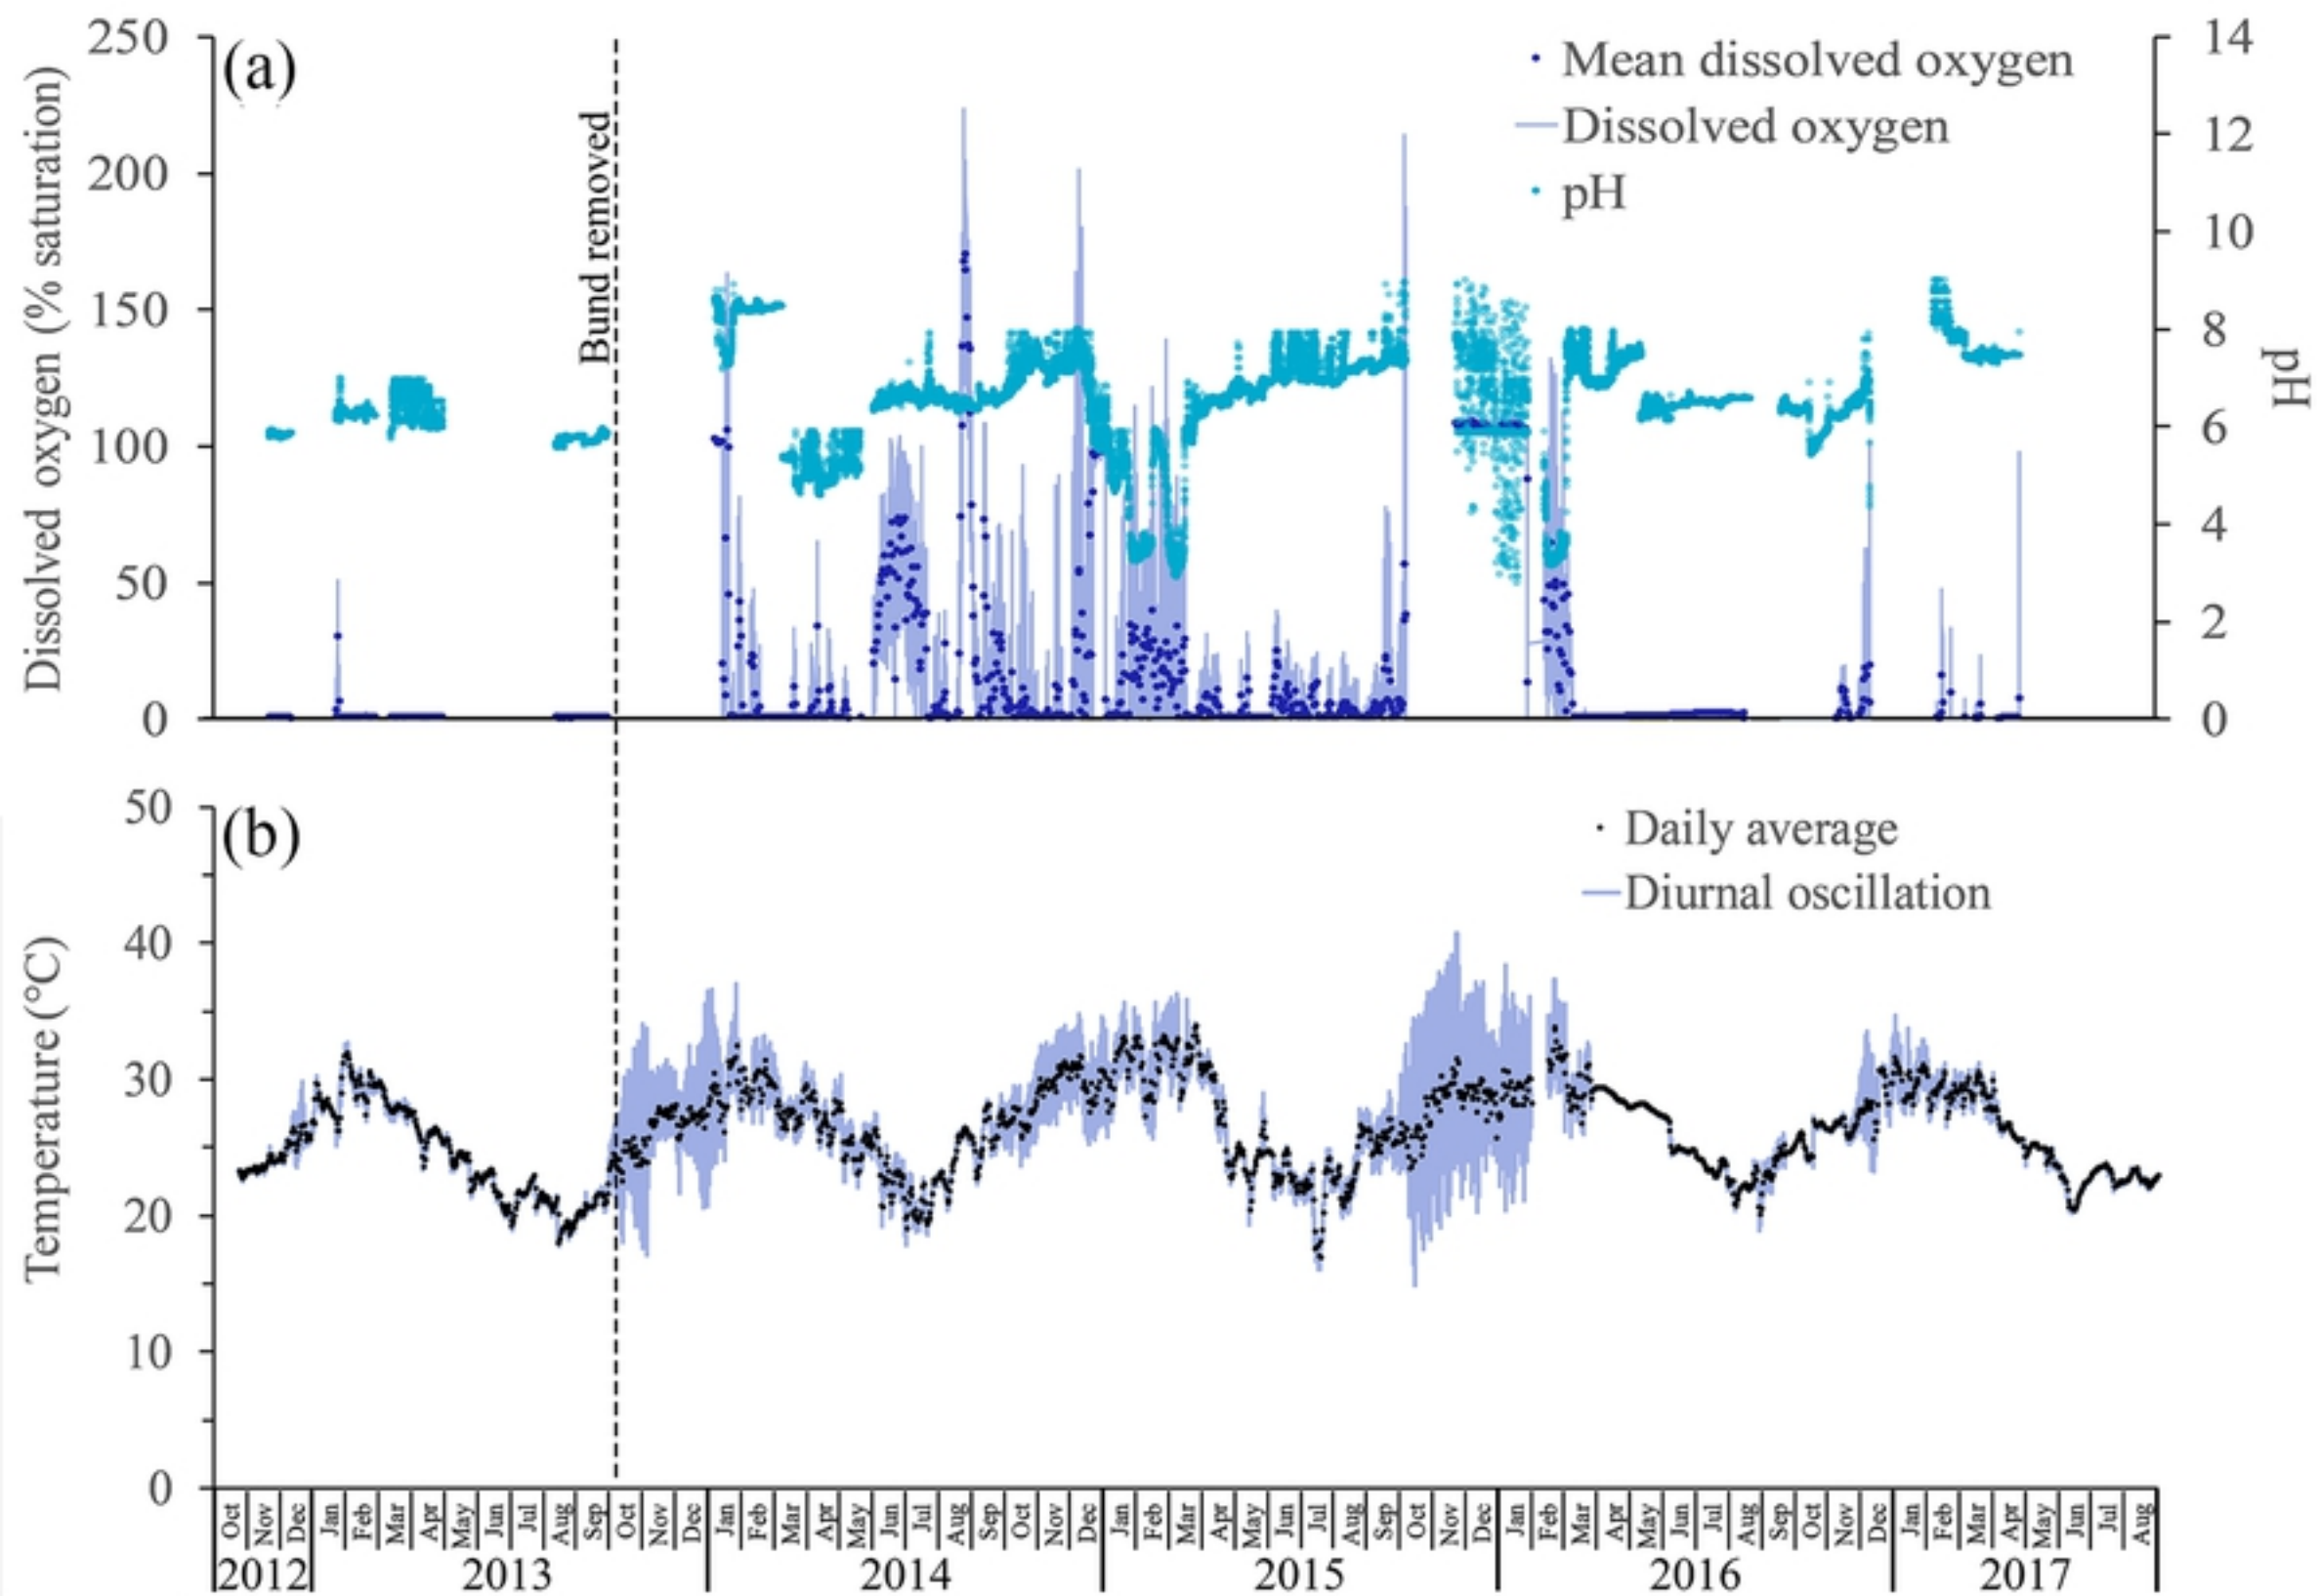

Figure

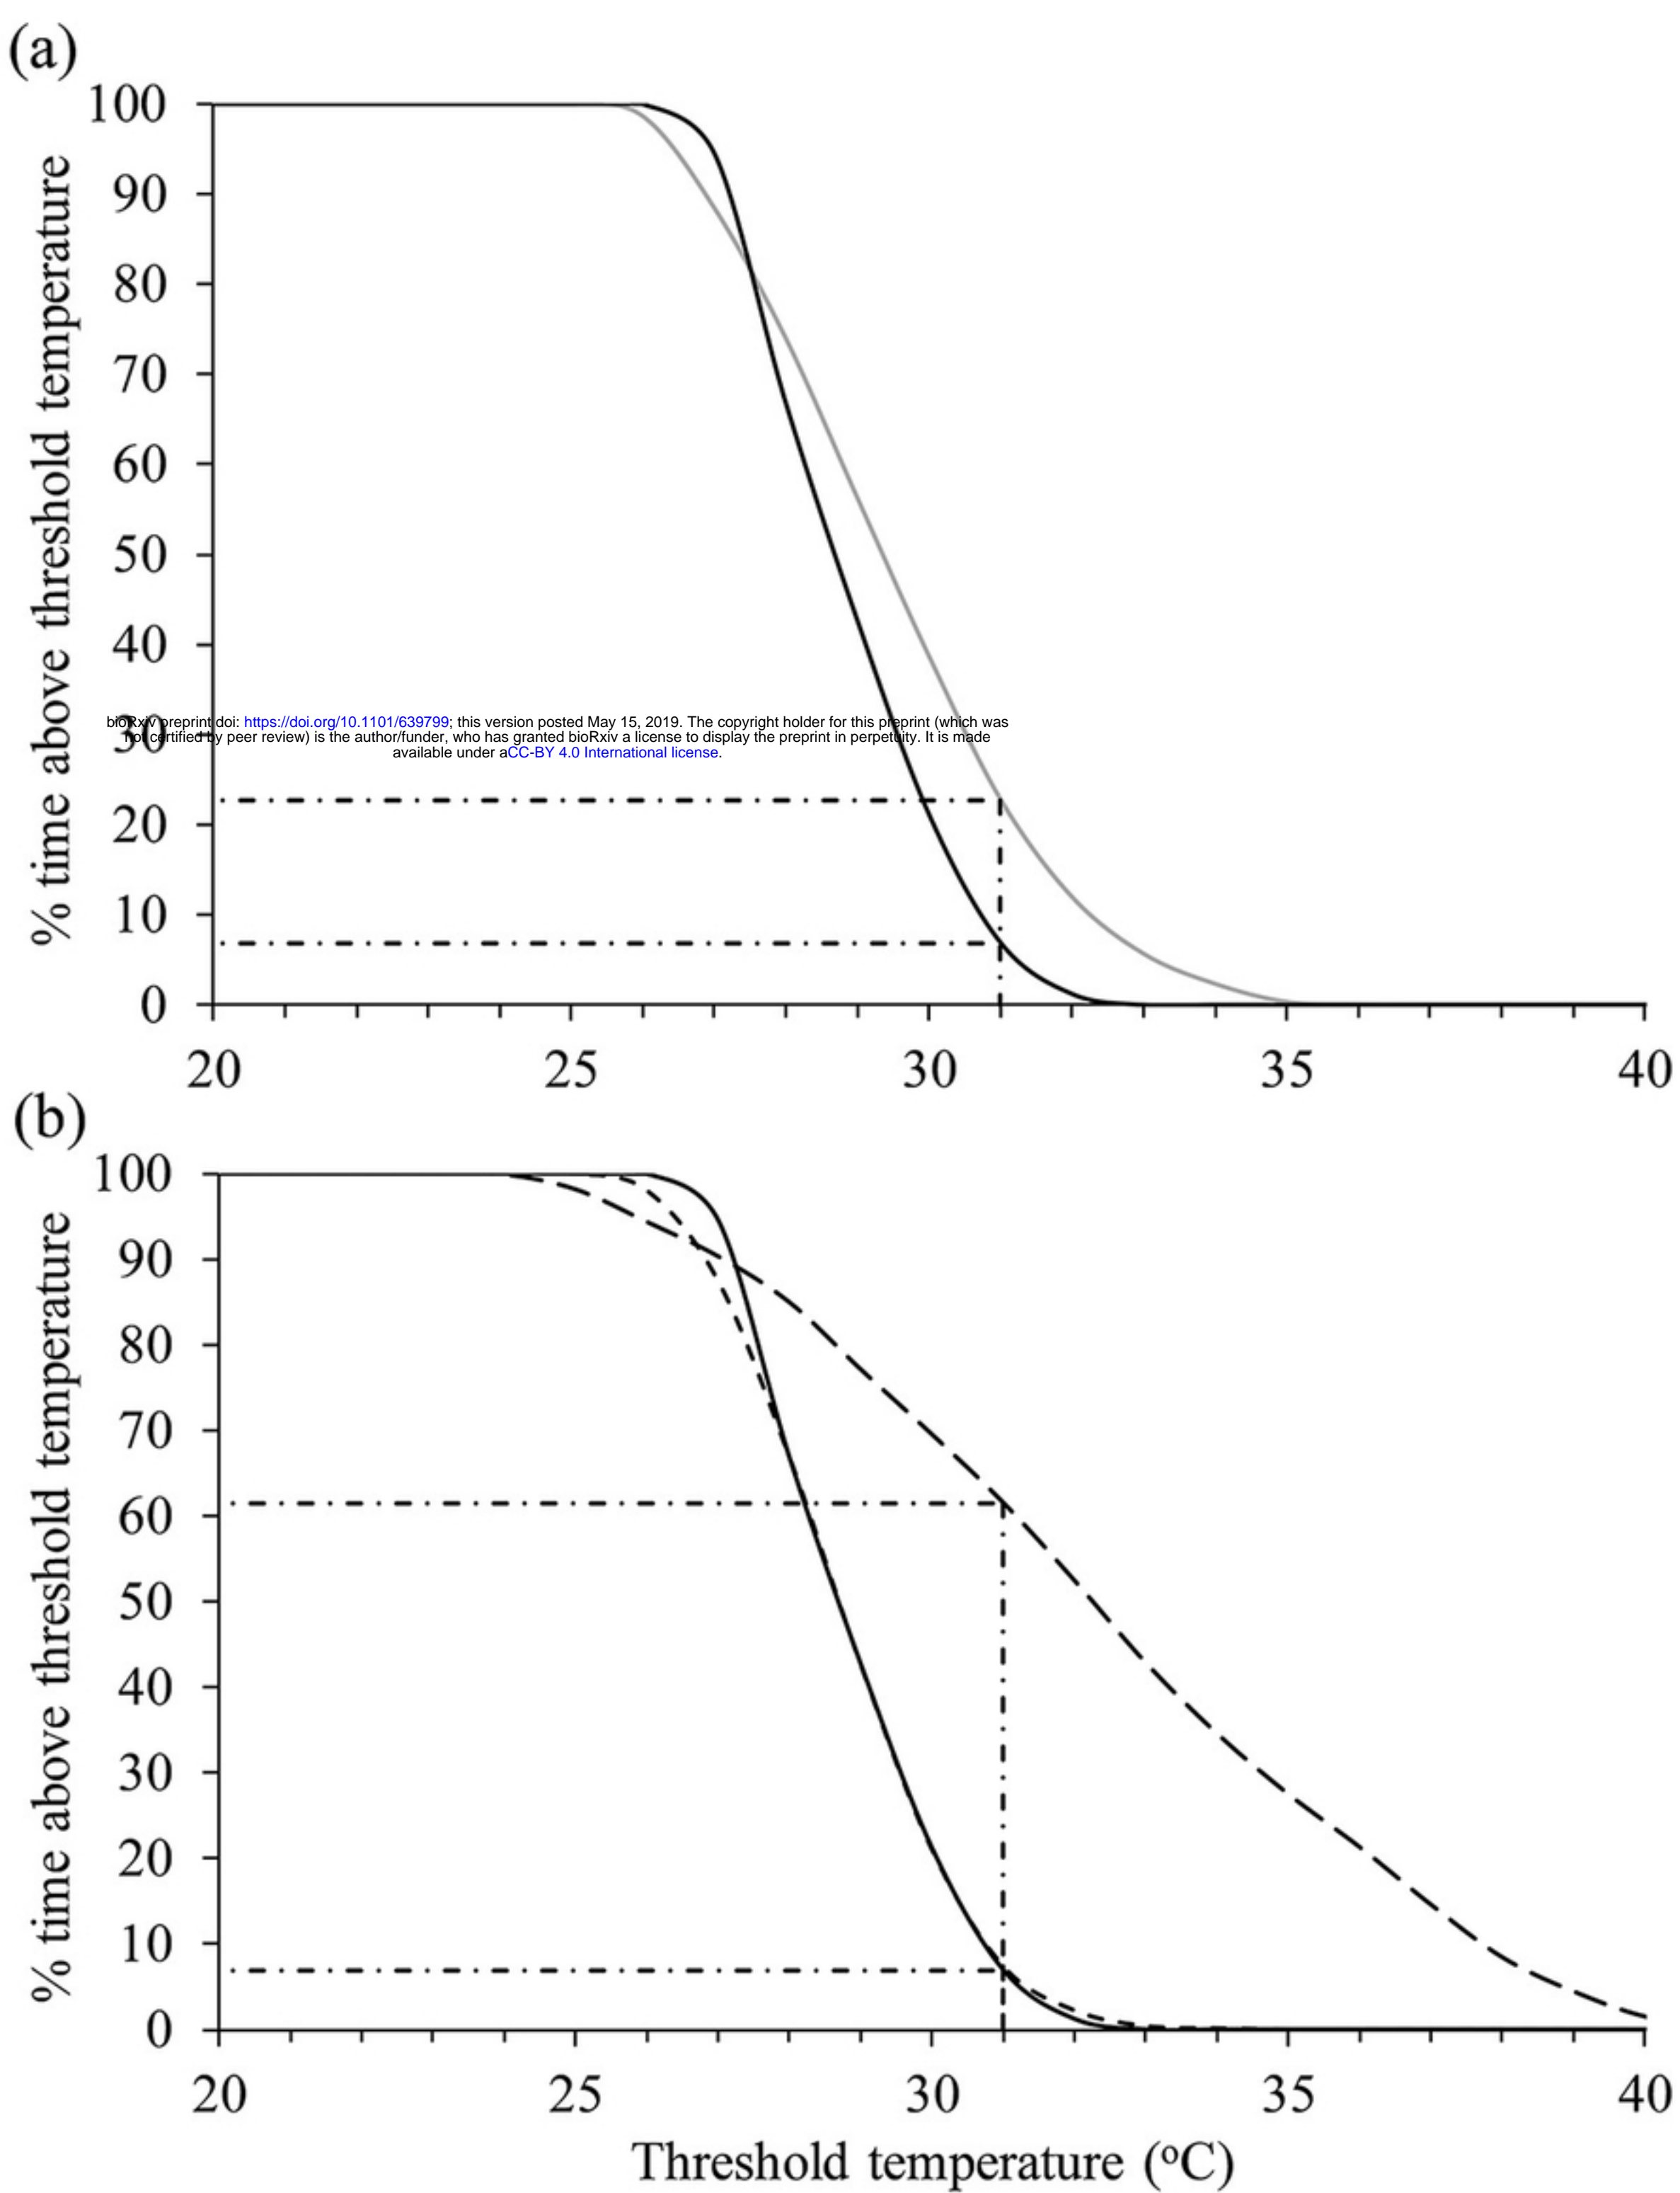

Figure
